# Supplementary material for: XPEAK: an XRD-driven machine learning platform for predicting the catalyst-enhanced dehydrogenation peak temperature of MgH 2
Source: Royal Society of Chemistry journal article supplement (doi:10.1039/d5ta08221h), 2026-01-01
Supplement: d5ta08221h1.pdf [file d5ta08221h1.pdf]

## Supplementary Information

### XPEAK: An XRD-Driven Machine Learning Platform for Predicting the Catalyst-Enhanced Dehydrogenation Peak Temperature of $\text{MgH}_2$

Weijie Yang<sup>ab,\*</sup>, Zhuoran Xu<sup>ab</sup>, Jiongyang Li<sup>c</sup>, Leping Zhang<sup>c</sup>, Man Shu<sup>ab</sup>, Jianghao Cai<sup>ab</sup>, Tongao Yao<sup>ab</sup>, Xiaotian Tang<sup>ab</sup>, Yuxuan Liu<sup>ab</sup>, Shiwen Luo<sup>ab</sup>, Xuqiang Shao<sup>c</sup>, Wenjing Wang<sup>d</sup>, Zhengyang Gao<sup>ab</sup>

<sup>a</sup> Department of Power Engineering, School of Energy, Power and Mechanical Engineering, North China Electric Power University, Baoding, 071003, China

<sup>b</sup> Hebei Key Laboratory of Energy Storage and Integrated Energy Systems, North China Electric Power University, Baoding 071003, Hebei, China

<sup>c</sup> Department of Computer Science, North China Electric Power University, Baoding 071003, Hebei, China

<sup>d</sup> College of Life Sciences, Institute of Life Sciences and Green Development, Hebei University, Baoding 071002, China

**\*Corresponding Author:** Weijie Yang(yangwj@ncepu.edu.cn)

# Contents

|                                       |    |
|---------------------------------------|----|
| <u>Supplementary Method</u> .....     | 3  |
| <u>Supplementary Figures</u> .....    | 8  |
| <u>Supplementary Tables</u> .....     | 33 |
| <u>Supplementary References</u> ..... | 45 |

## Supplementary Method

### Method S1

Scientific literature represents an important and reliable source of data in the field of materials science. With years of accumulation, a substantial volume of experimental data is now available for constructing robust datasets. In this study, the data used for regression model development were obtained through a systematic review of 810 publications related to Mg-based solid-state hydrogen storage materials published between 2005 and 2024. The literature was retrieved from databases such as Web of Science and Google Scholar. During the initial screening, studies involving complex hydride systems (e.g.,  $\text{MgH}_2\text{-LiBH}_4$ [1,2],  $\text{MgH}_2\text{-AlH}_3$ [3–5]), Mg-based alloys, and  $\text{Mg}(\text{BH}_4)_2$ [6] were excluded. A total of 453 studies focusing specifically on the catalytic regulation of hydrogen storage/release performance of  $\text{MgH}_2$  were retained. After further excluding papers lacking differential scanning calorimetry (DSC) characterization data, 420 publications were ultimately selected as valid sources for model training.

A total of 2,011 data entries were compiled for “ $\text{MgH}_2$  + catalyst” composite systems, each containing DSC measurements of the  $T_p$ . Among them, 1,349 samples additionally included the  $\Delta T_p$  before and after catalyst addition, all of which were used for regression modeling. Given the significant influence of heating rates on  $T_p$ [7,8], the dataset also records the heating rates for each sample, and all  $\Delta T_p$  values were calculated under identical heating conditions to ensure data comparability and physical consistency. Furthermore, to account for the effect of catalyst dosage on performance, the mass fraction of the added catalyst was also recorded for each sample[9,10].

In addition, to further advance the field of solid-state hydrogen storage, we have developed a dedicated database platform named Digital Hydrogen-S in a separate project. This platform provides processing information, performance characterization, and morphological characterization data for  $\text{MgH}_2$  and a broader range of materials. The data from the present study has been integrated into this website, which is accessible at <https://s-hydrogendataplatfrom.nas.cpolar.cn>.

## Method S2

There is a discrepancy in the sampling points between the original XRD spectra from the literature and databases, which is not conducive to subsequent modeling. To address this, the following standardization process was adopted: all spectra were unified to an equidistant grid in the  $2\theta$  range of  $5^\circ$  to  $90^\circ$  with a step size of  $\Delta 2\theta = 0.02$  using linear interpolation. The interpolation formula is as follows:

$$2\theta = 2\theta_0 + \frac{(2\theta_1 - 2\theta_0)}{(I_1 - I_0)}(I - I_0) \quad (1)$$

All relative intensities were normalized to the  $[0, 1]$  range using MinMaxScaler:

$$I_{\text{scaled}} = \frac{I - \min(I)}{\max(I) - \min(I)} \quad (2)$$

In equations (1) and (2),  $2\theta$  represents the diffraction angle, and  $I$  represents the relative intensity of the spectrum.

To balance overall accuracy and computational cost, this study uniformly defines the diffraction angle range of all XRD feature matrices as  $5^\circ$ - $90^\circ$ . Linear interpolation with a step size of  $0.02^\circ$  is applied to ICDD XRD data, while quadratic interpolation with a step size of  $0.01^\circ$  is used for EXP XRD data.

To ensure good interpolation results and enhance the robustness of the program, the following design was implemented: the coordinates of the top 20 peaks with the highest relative intensities in the original spectrum were dynamically saved, and for repeated angles, the average intensity was taken to avoid interpolation anomalies. Interpolation was performed using the linear method, and the diffraction angle boundaries were extended to reduce edge effects in the interpolation. After interpolation, the intensity of the nearest neighboring grid points was replaced to preserve key structural features. For samples with missing intensity values in the standard interpolation grid, zero-padding was applied to ICDD XRD data, and boundary extension was used for EXP XRD data. Since the spectra contain all representative diffraction peaks and missing data occur mainly in non-characteristic regions, these approaches do not compromise phase representation or regression model performance.

### Method S3

To elucidate the complex nonlinear relationships between material features and dehydrogenation performance, this study employs the SHapley Additive exPlanations (SHAP) method. SHAP quantifies the marginal contribution of each feature to the prediction of an individual sample, under the following axiomatic framework:

$$\phi_i(\mathbf{f}, x) = \sum_{S \subseteq \mathbf{N} \setminus \{i\}} \frac{|S|!(\mathbf{M} - |S| - 1)!}{\mathbf{M}!} [\mathbf{f}_x(S \cup \{i\}) - \mathbf{f}_x(S)] \quad (3)$$

In Equation (3),  $\phi_i$  is the SHAP value of feature  $i$ ,  $\mathbf{M}$  is the total number of features,  $\mathbf{N}$  denotes the complete set of features, and  $S \subseteq \mathbf{N} \setminus \{i\}$  represents any subset that excludes feature  $i$ .

t-SNE is a nonlinear dimensionality reduction algorithm commonly used for the visualization of high-dimensional data. The method optimizes the low-dimensional embedding by minimizing the Kullback-Leibler divergence between the two distributions. The Kullback-Leibler divergence is calculated as follows:

In Equation (4),  $p_{ij}$  represents the true distribution, and  $q_{ij}$  represents the approximate distribution

$$\text{KL}(\mathbf{P} \parallel \mathbf{Q}) = \sum_{i \neq j} p_{ij} \log \frac{p_{ij}}{q_{ij}} \quad (4)$$

## Method S4

In experimental studies, XRD patterns of synthesized samples often deviate from ideal diffraction profiles due to factors such as grain size, lattice defects or stress, preferred crystallographic orientation, and instrumental noise. These deviations typically manifest as peak broadening, peak splitting, and background noise. To generate training and input data that better resemble experimental data reported in the literature, we propose a simulation method for generating pseudo-experimental XRD patterns based on physical principles and standard diffraction profiles. This method incorporates multiple factors, including microstructural characteristics, instrumental parameters, and experimental noise. A comprehensive model was developed to simulate the effects of crystallite size distribution, microstrain, thermal diffuse scattering, and instrumental broadening. The crystallite size was randomly sampled within a defined range to enhance the robustness and generalizability of the generated data.

The peak profiles were simulated using the Voigt function, which is the convolution of a Gaussian and a Lorentzian function. The mathematical expression of the Voigt function is given by:

$$V(x) = \int_{-\infty}^{\infty} G(x') L(x - x') dx' \quad (5)$$

The Gaussian component represents the peak broadening caused by the instrument, and its full width at half maximum (FWHM) is calculated using the Caglioti equation:

$$H_{inst} = \sqrt{U \tan^2 \theta + V \tan \theta + W} \quad (6)$$

The Lorentzian component accounts for peak broadening caused by crystallite size and lattice strain, and is calculated as follows:

$$H_{size} = \frac{K \lambda}{D \cos \theta} \quad (7)$$

$$H_{strain} = 4 \varepsilon \tan \theta \quad (8)$$

The crystallite size is generated based on a skew normal distribution, whose probability density function is given by:

$$f(x | \mu, \sigma, \alpha) = \frac{2}{\sigma} \phi\left(\frac{x - \mu}{\sigma}\right) \Phi\left(\alpha \left(\frac{x - \mu}{\sigma}\right)\right) \quad (9)$$

The thermal diffuse scattering effect is introduced by incorporating the Debye–Waller factor, which accounts for the intensity attenuation caused by atomic thermal vibrations:

$$I_{TDS} = I_0 \exp\left(-B \frac{\sin^2 \theta}{\lambda^2}\right) \quad (10)$$

The preferred orientation of the crystal is simulated using the following equation:

$$I_{hkl} = I_0 \cdot \frac{\beta}{\sqrt{1 + (\beta^2 - 1) \cos^2 \psi}} \quad (11)$$

A probabilistic triggering mechanism was employed to simulate peak splitting, where peak splitting occurs if the splitting probability  $P > 0.3$ . Background noise was diversified by incorporating Gaussian white noise, impulsive noise, and baseline drift.

## Supplementary Figures

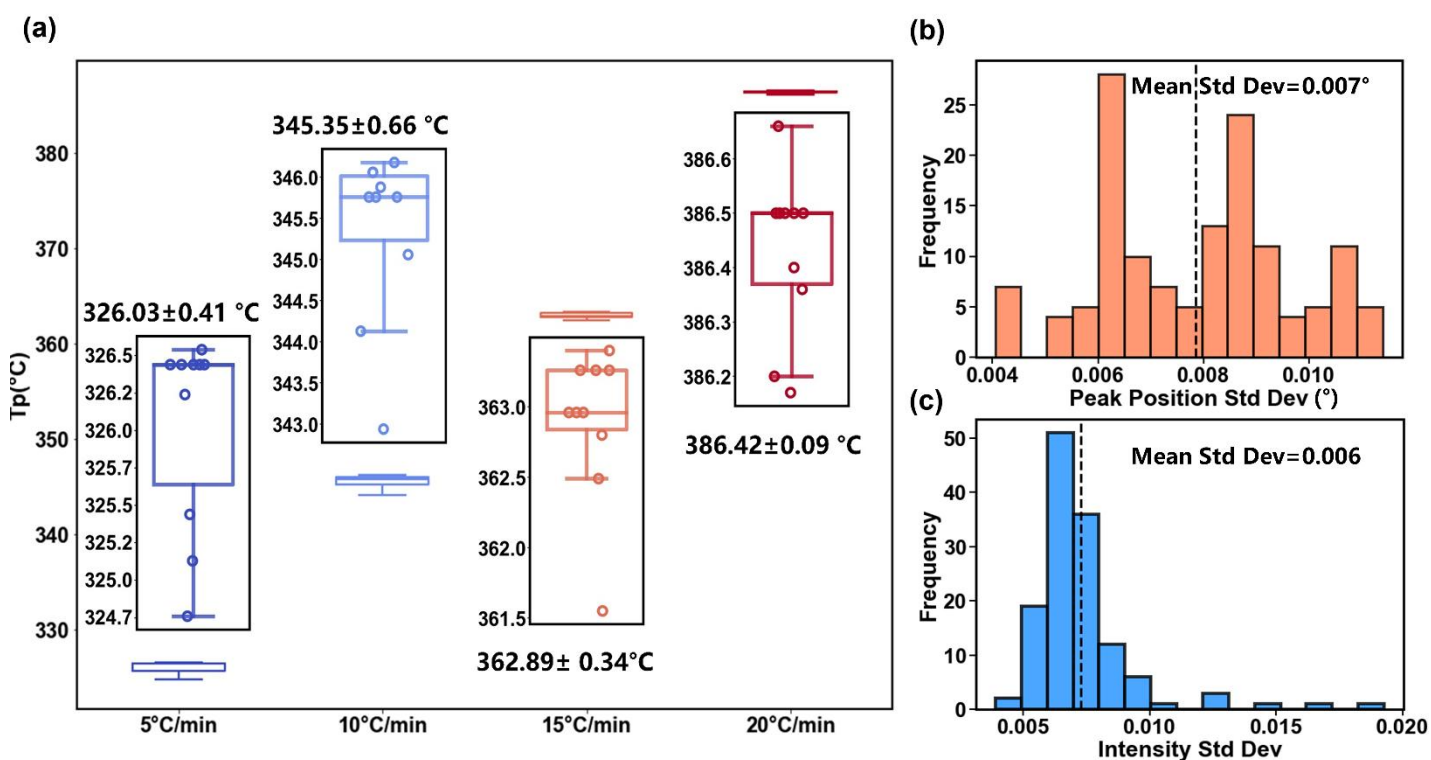

**Fig. S1** (a) Analysis of the uncertainties associated with manually extracting  $T_p$  values using WebPlotDigitizer. (b) Standard deviation distribution of  $2\theta$  peak positions extracted from XRD data. (c) Standard deviation distribution of normalized peak intensity extracted from XRD data.



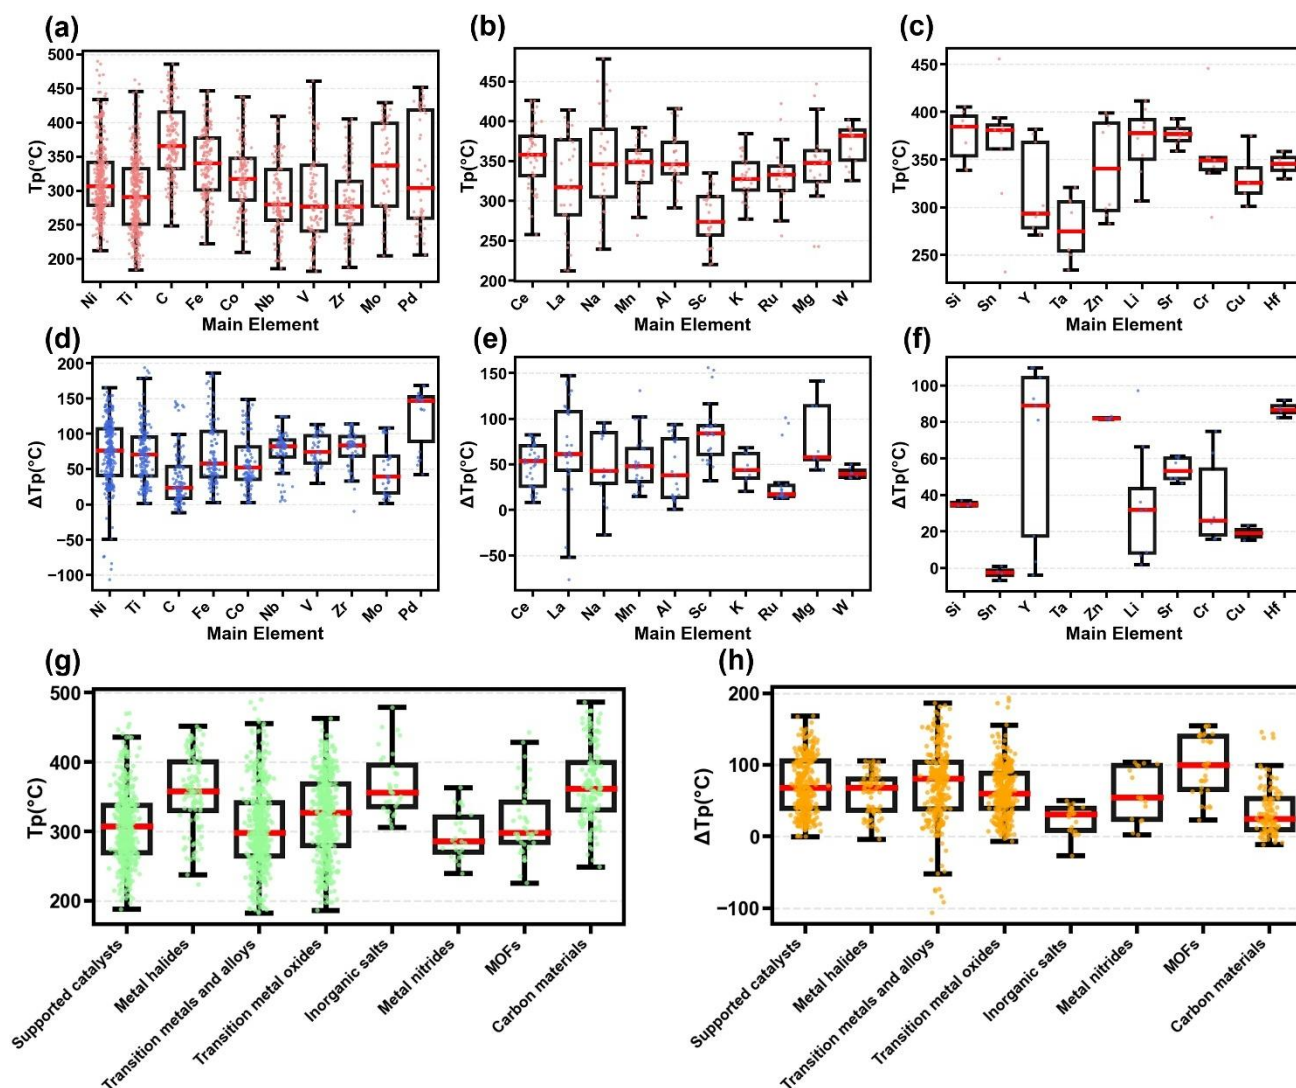

**Fig. S2** (a–c) Distribution of  $T_p$  for catalysts composed of different elemental species; (d–f) distribution of  $\Delta T_p$  for catalysts composed of different elemental species; (g) distribution of  $T_p$  across catalyst categories; (h) distribution of  $\Delta T_p$  across catalyst categories.

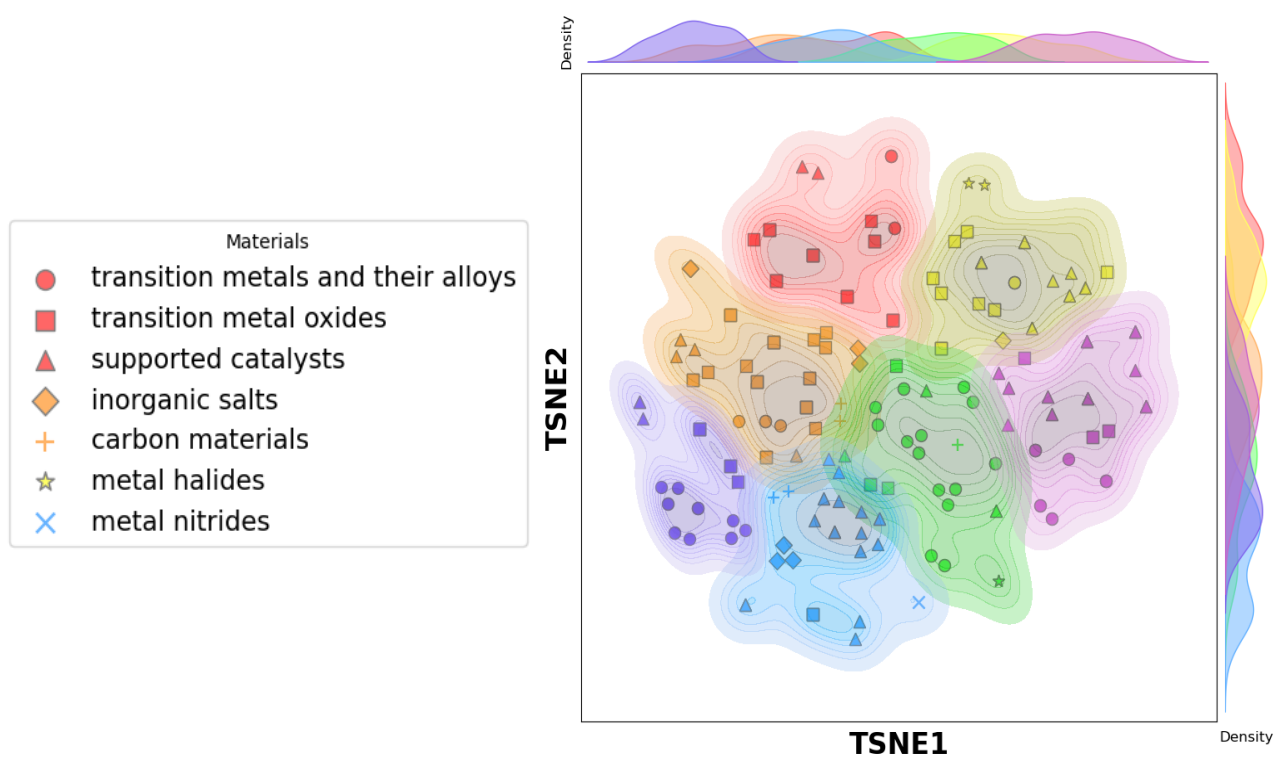

**Fig. S3** Feature clustering analysis of selected samples using t-SNE and K-Means.

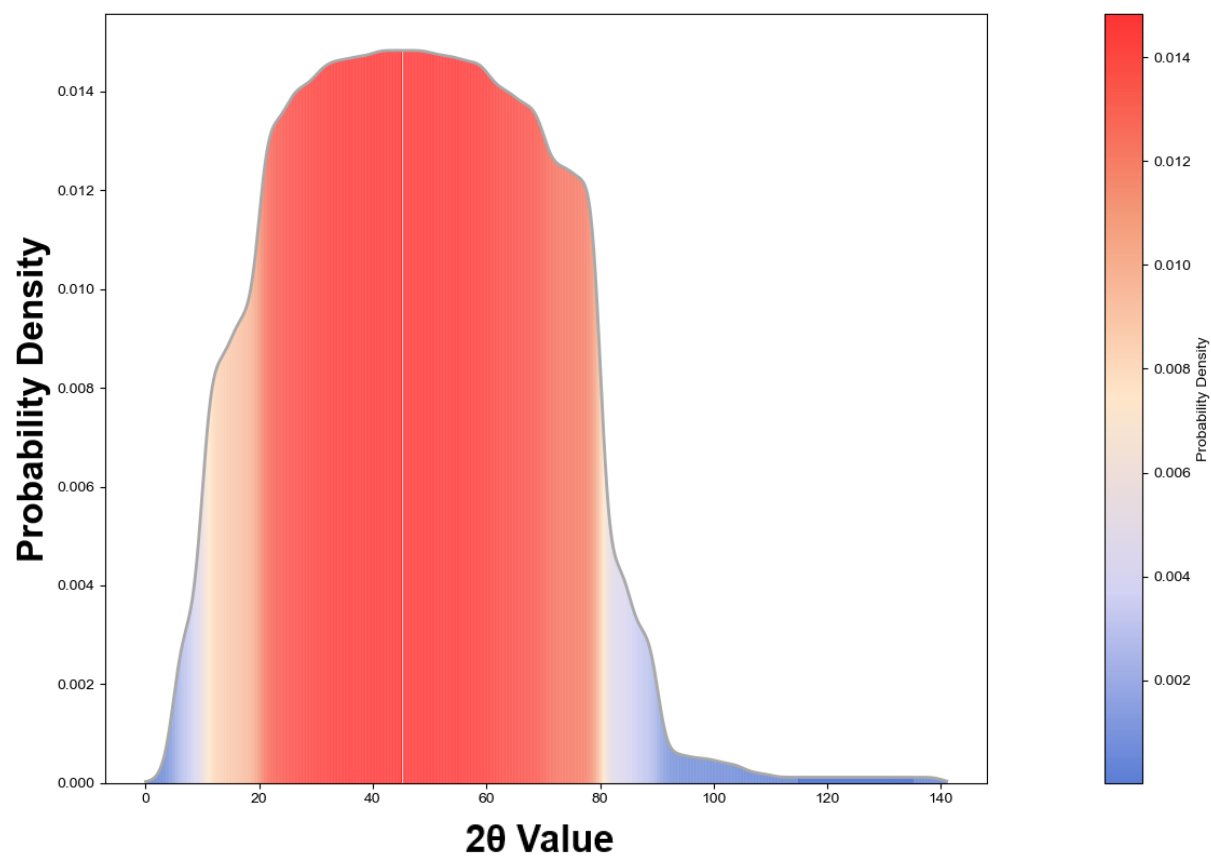

**Fig. S4** Probability density distribution of diffraction angles corresponding to relative diffraction intensities in the catalyst XRD data from the database.

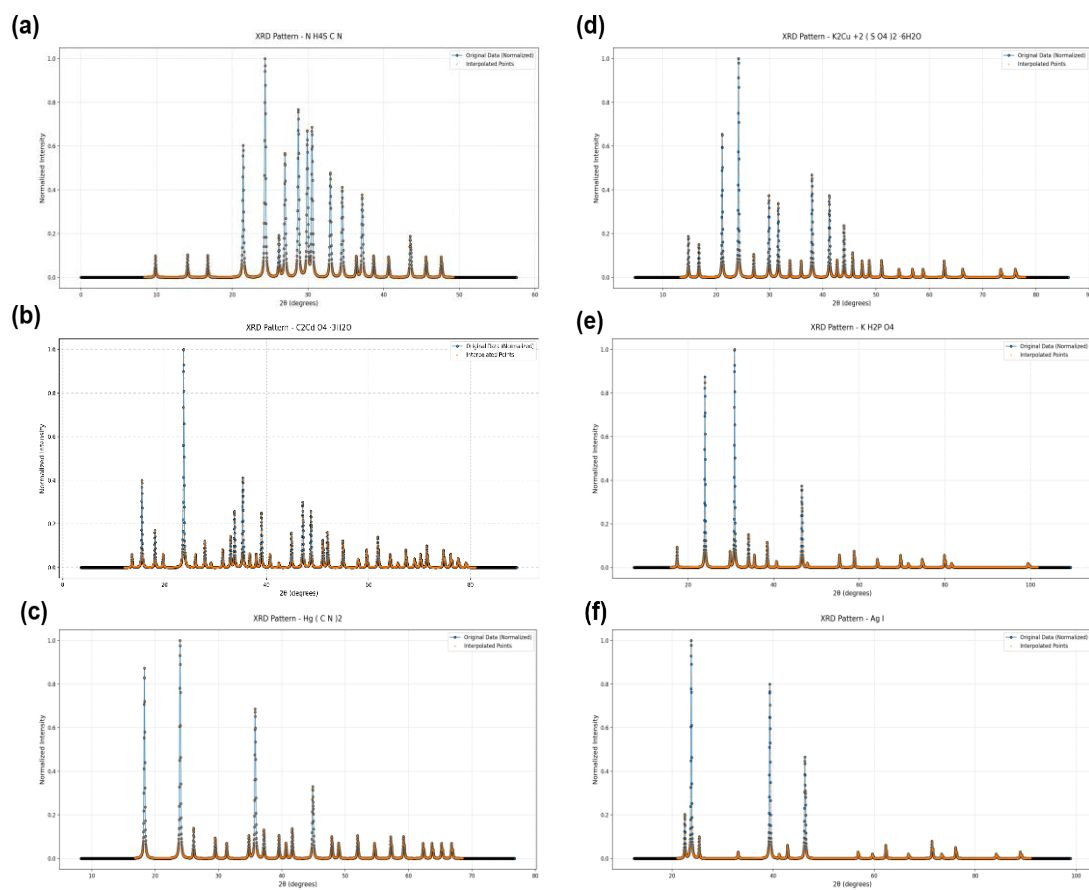

**Fig. S5** Interpolation performance of randomly selected samples from the prediction set. The figure compares the original XRD patterns with those reconstructed by linear interpolation after normalization.

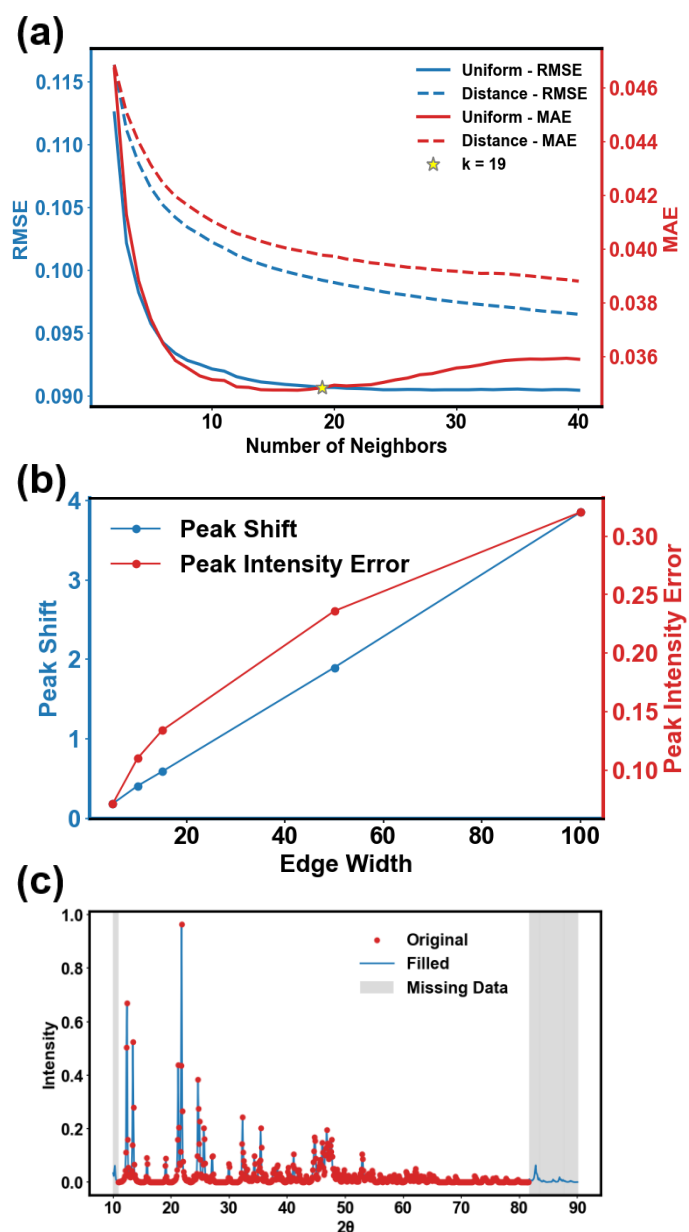

**Fig. S6** Performance of the KNN imputation model combined with a weighted loss function for fitting missing boundary points. (a) MAE (red) and RMSE (blue) trends with varying neighbor counts using Uniform (solid lines) and Distance (dashed lines) sample distance metrics. (b) Trends of peak position shifts and peak intensity deviations as boundary missing intensity varies. (c) Imputation example for a random sample: red points represent original data, blue solid line is the fitted spectrum after boundary supplementation, and the gray shaded area indicates the region of missing data in the original spectrum.

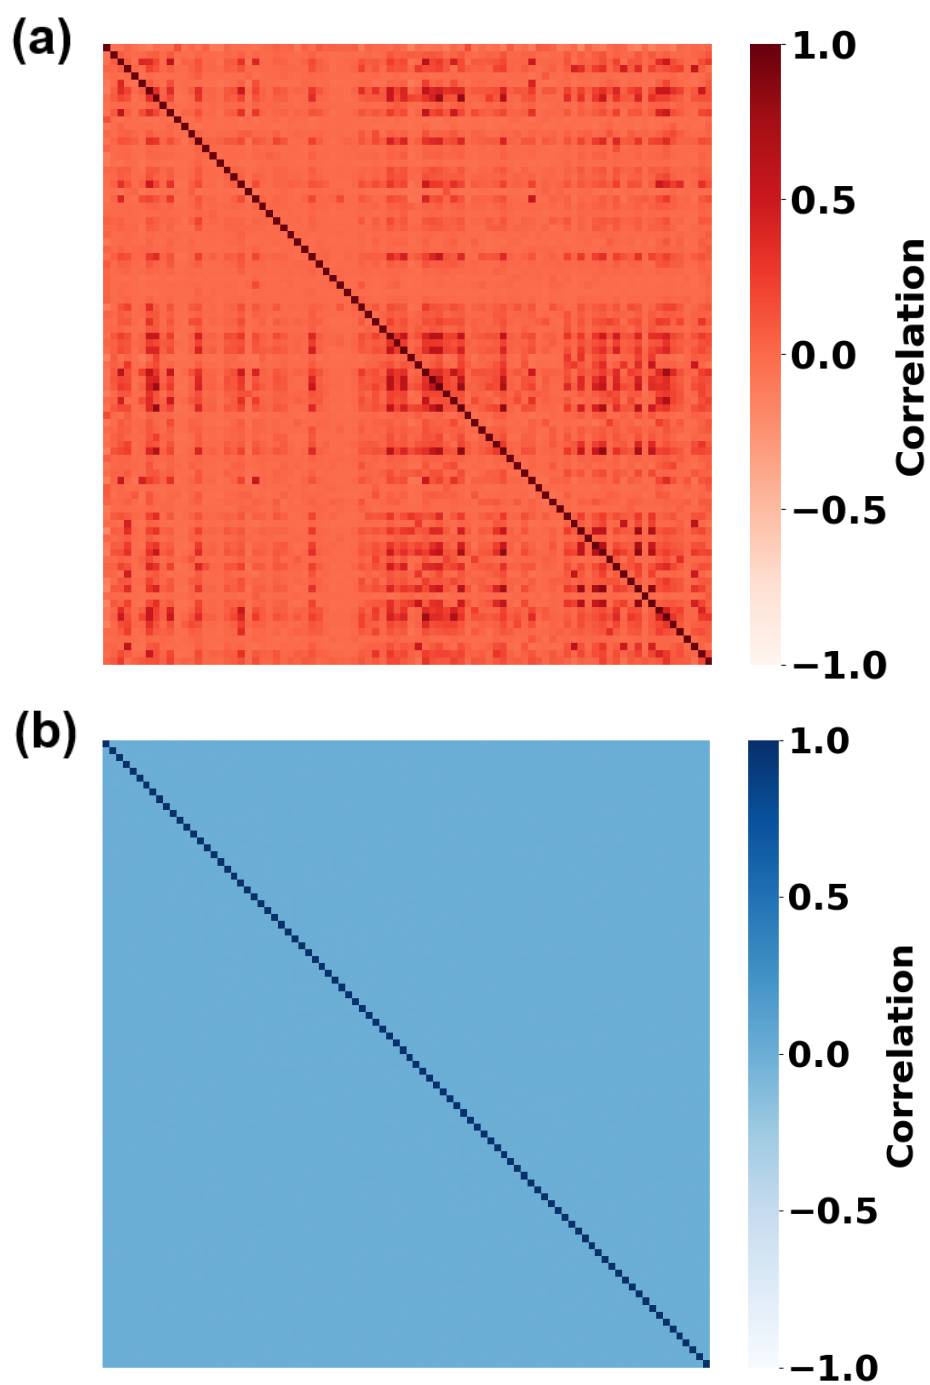

**Fig. S7** Linear correlation analysis of features. Pearson correlation heatmaps of all components after dimensionality reduction of the XRD feature matrix using (a) NMF and (b) kPCA.

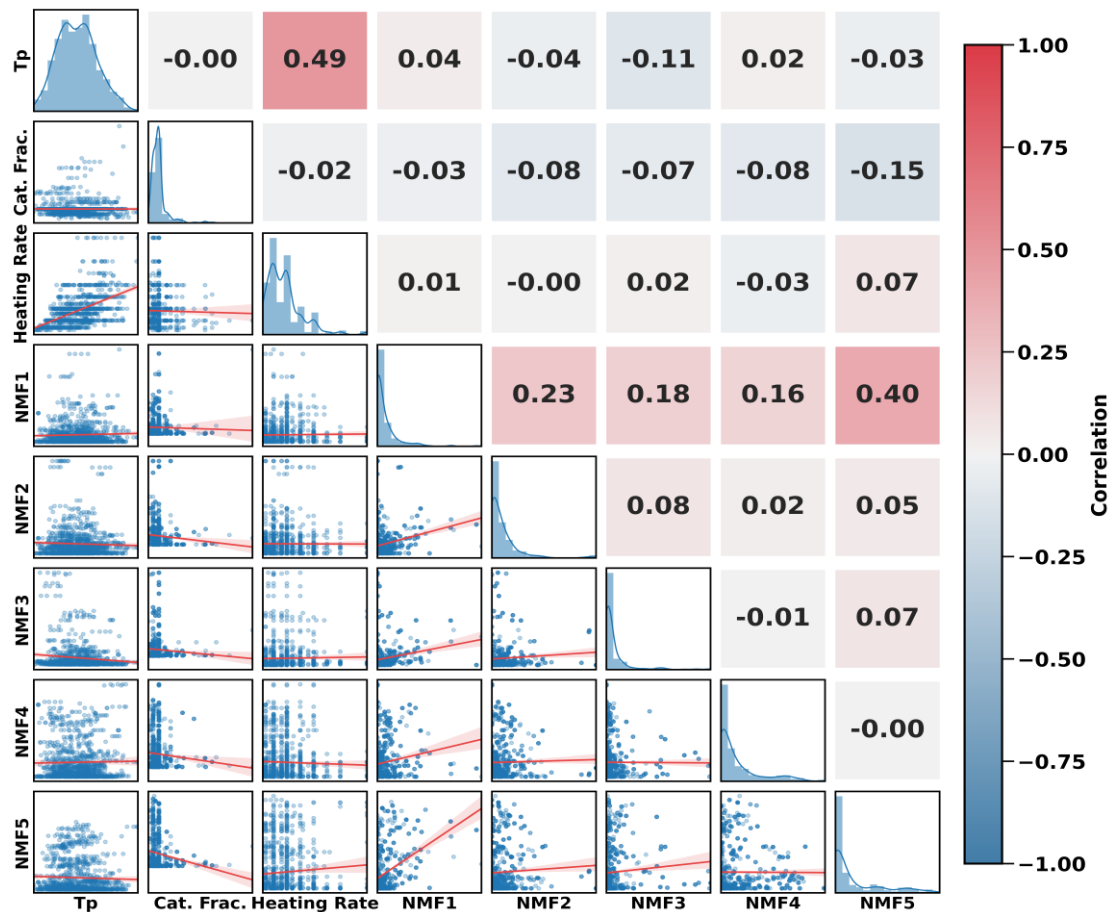

**Fig. S8** Relationships among local NMF features, environmental variables, and the *Tp*. Correspond to EXP XRD data. Variables are ordered as follows from top to bottom on the left and left to right along the bottom: *Tp*, Cat. Frac., Heating Rate, NMF1, NMF2, NMF3, NMF4, NMF5. Each panel includes marginal distribution histograms on the diagonal, pairwise scatter plots with linear regression fits in the lower triangle, and a Pearson correlation heatmap in the upper triangle.

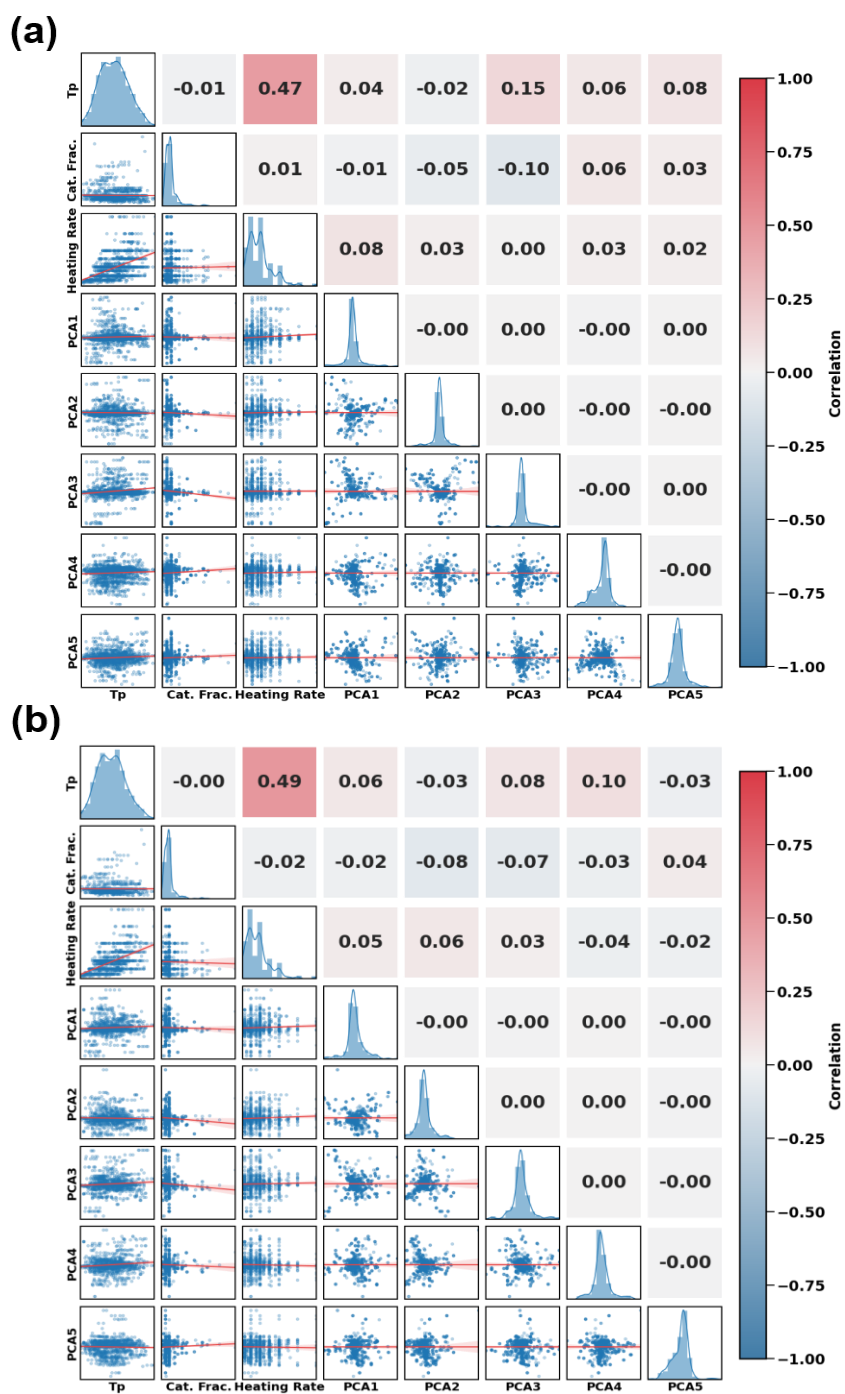

**Fig. S9** Symmetric matrix plots illustrating the relationships among locally kPCA features, environmental variables, and the Tp: (a) derived from ICDD XRD data and (b) derived from EXP XRD data. The figures include marginal distribution histograms along the diagonal, pairwise scatter plots with linear regression fits in the lower triangle, and Pearson correlation heatmaps in the upper triangle.



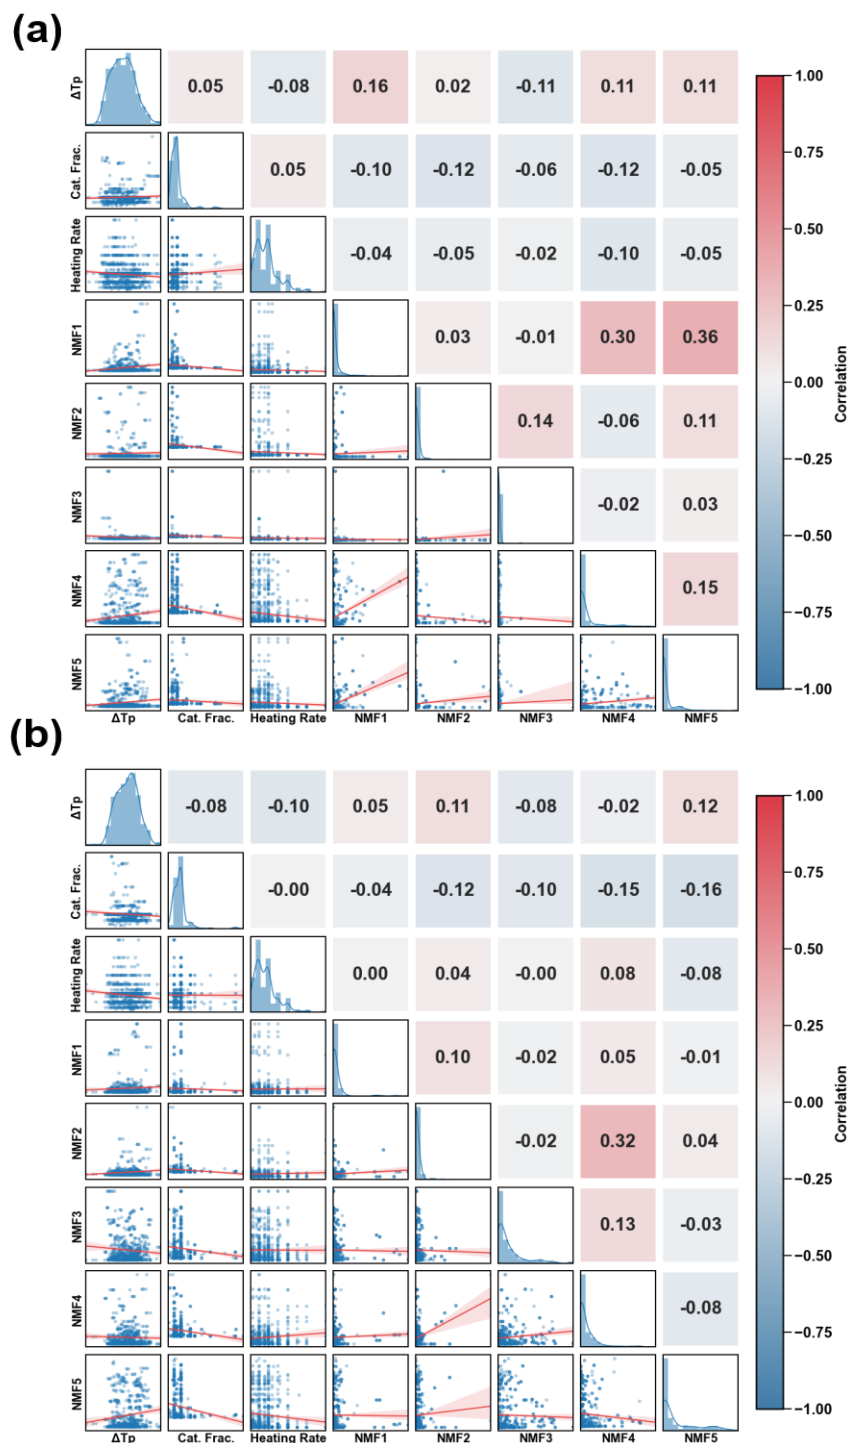

**Fig. S10** Symmetric matrix plot showing the relationships between the locally NMF features, environmental variables, and the  $\Delta T_p$ : (a) derived from ICDD XRD data and (b) derived from EXP XRD data. The figure includes: marginal distribution histograms along the diagonal, pairwise scatter plots with linear regression fits in the lower triangle, and a Pearson correlation heatmap in the upper triangle.

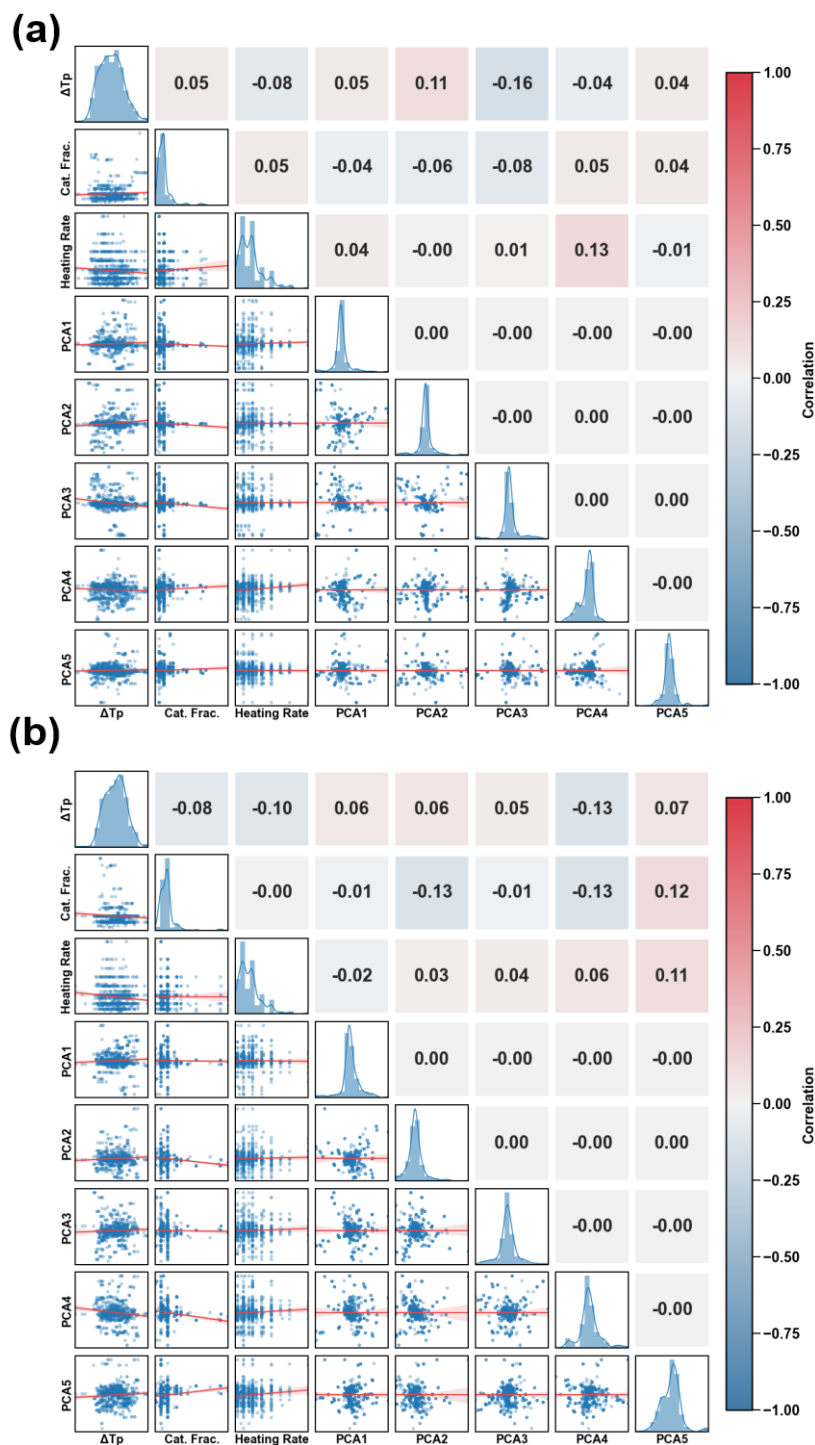

**Fig. S11** Symmetric matrix plot showing the relationships between the locally kPCA features, environmental variables, and the  $\Delta T_p$ : (a) derived from ICDD XRD data and (b) derived from EXP XRD data. The figure includes: marginal distribution histograms along the diagonal, pairwise scatter plots with linear regression fits in the lower triangle, and a Pearson correlation heatmap in the upper triangle.

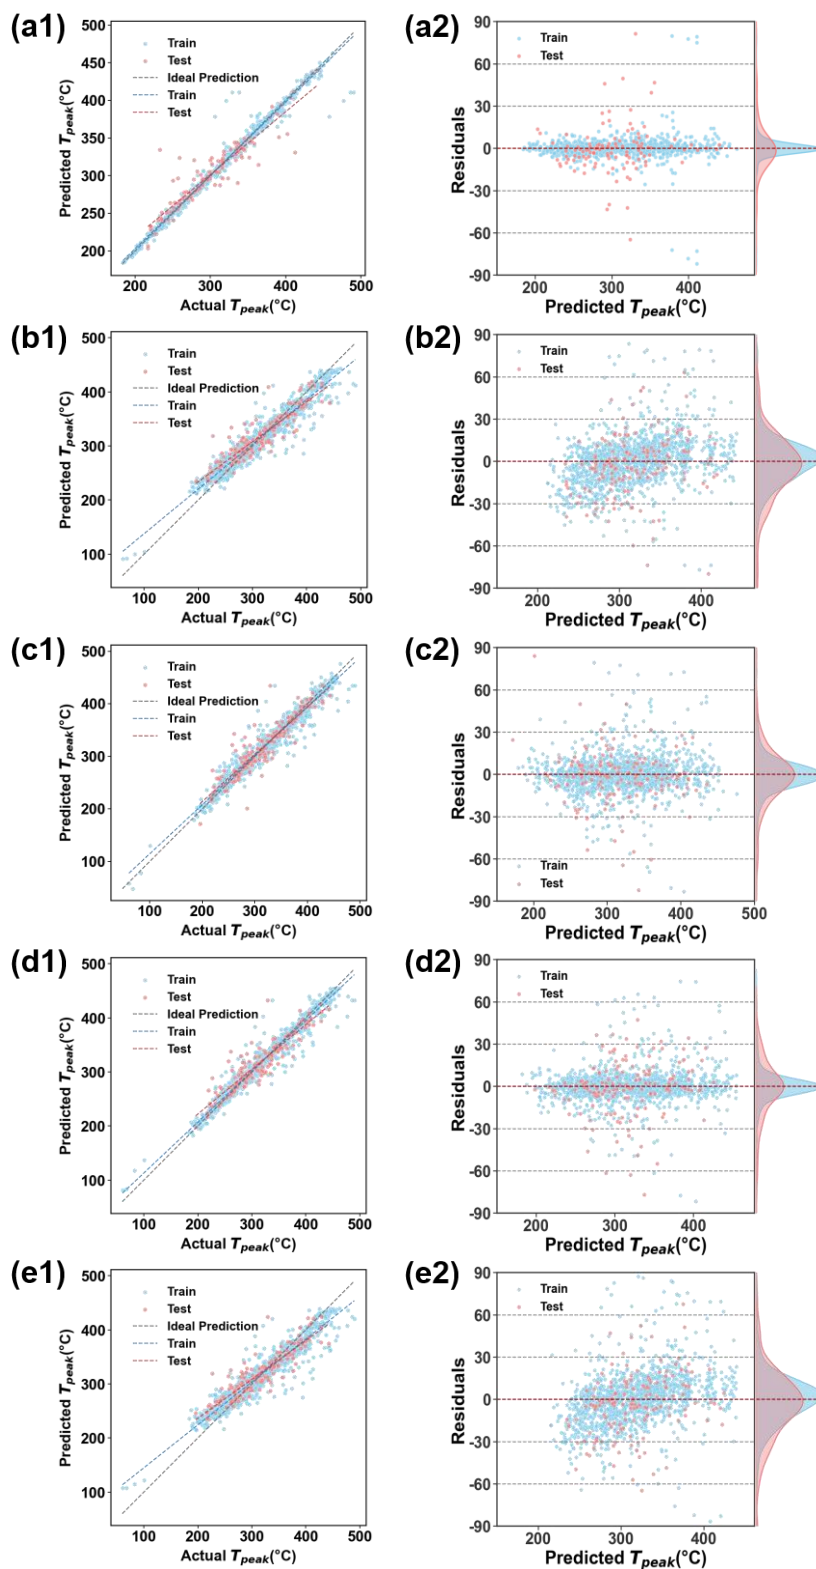

**Fig. S12** Performance of non-optimal  $T_p$  prediction models constructed using ICDD XRD data. Each subplot includes a scatter plot of predicted vs. actual values (left) and residual distribution (right), corresponding to: (a) NMF+XGB, (b) NMF+RF, (c) kPCA+XGB, (d) kPCA+LGBM, and (e) kPCA+RF.

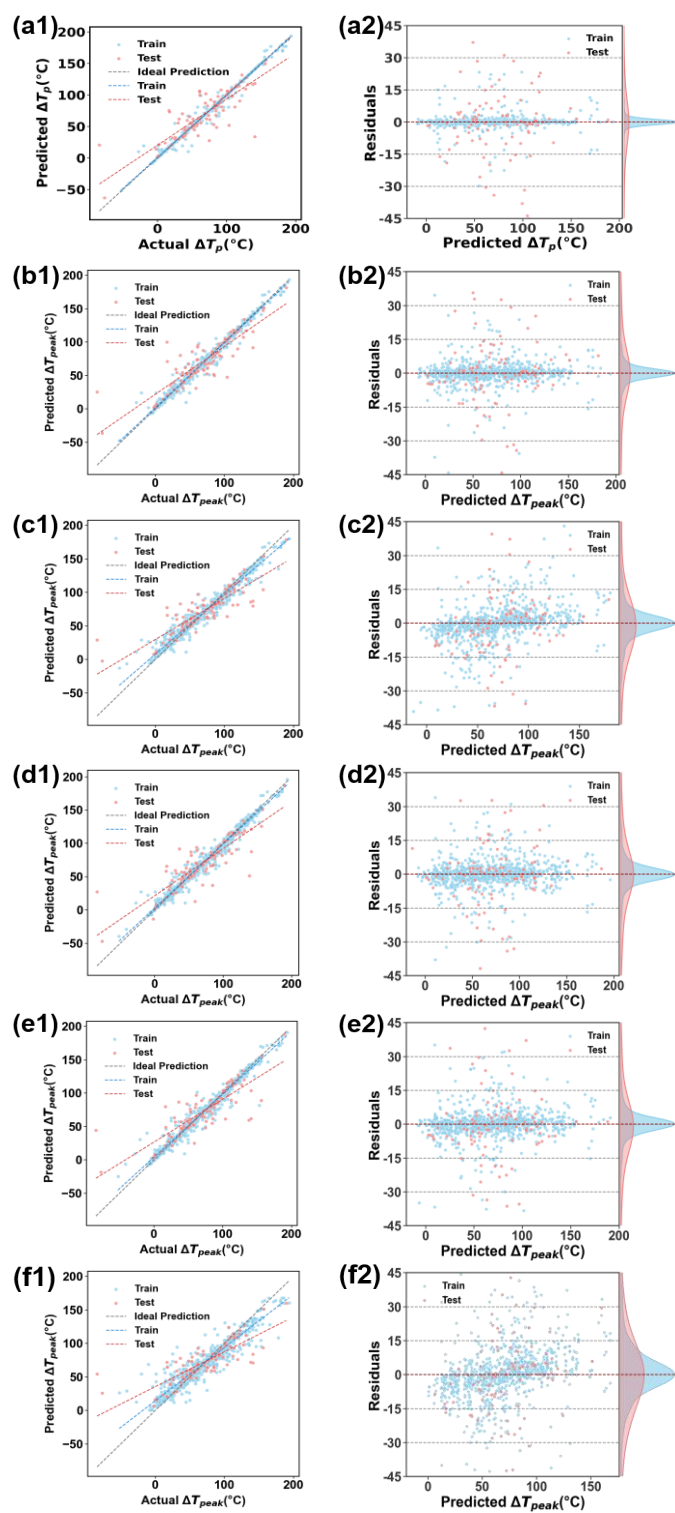

**Fig. S13** Performance of non-optimal  $\Delta T_p$  prediction models constructed using ICDD XRD data. Each subplot includes a scatter plot of predicted vs. actual values (left) and residual distribution (right), corresponding to: (a) NMF+XGB, (b) NMF+LGBM, (c) NMF+RF, (d) kPCA+XGB, (e) kPCA+LGBM, (f) kPCA+RF.

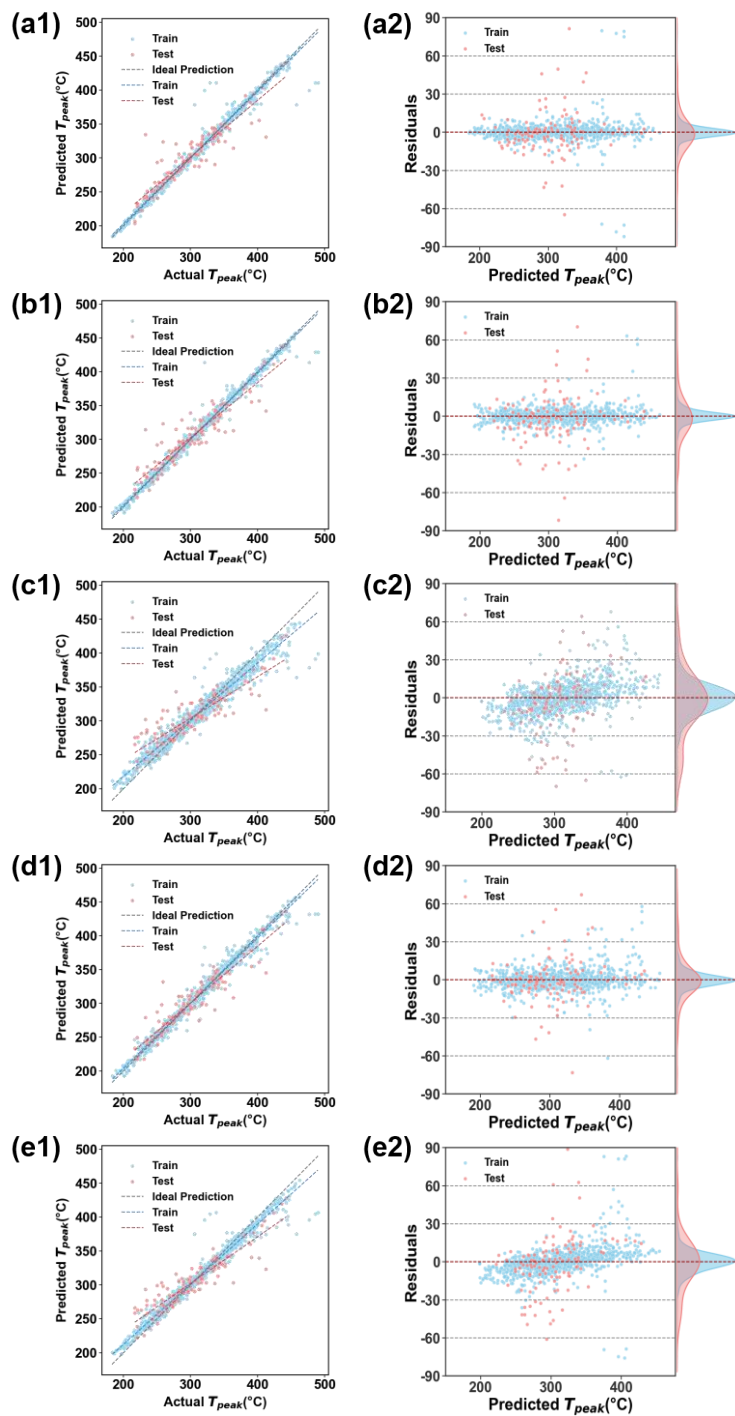

**Fig. S14** Performance of non-optimal  $T_p$  prediction models constructed using EXP XRD data. Each subplot includes a scatter plot of predicted vs. actual values (left) and residual distribution (right), corresponding to: (a) NMF+XGB, (b) NMF+LGBM, (c) NMF+RF, (d) kPCA+LGBM, (e) kPCA+RF.

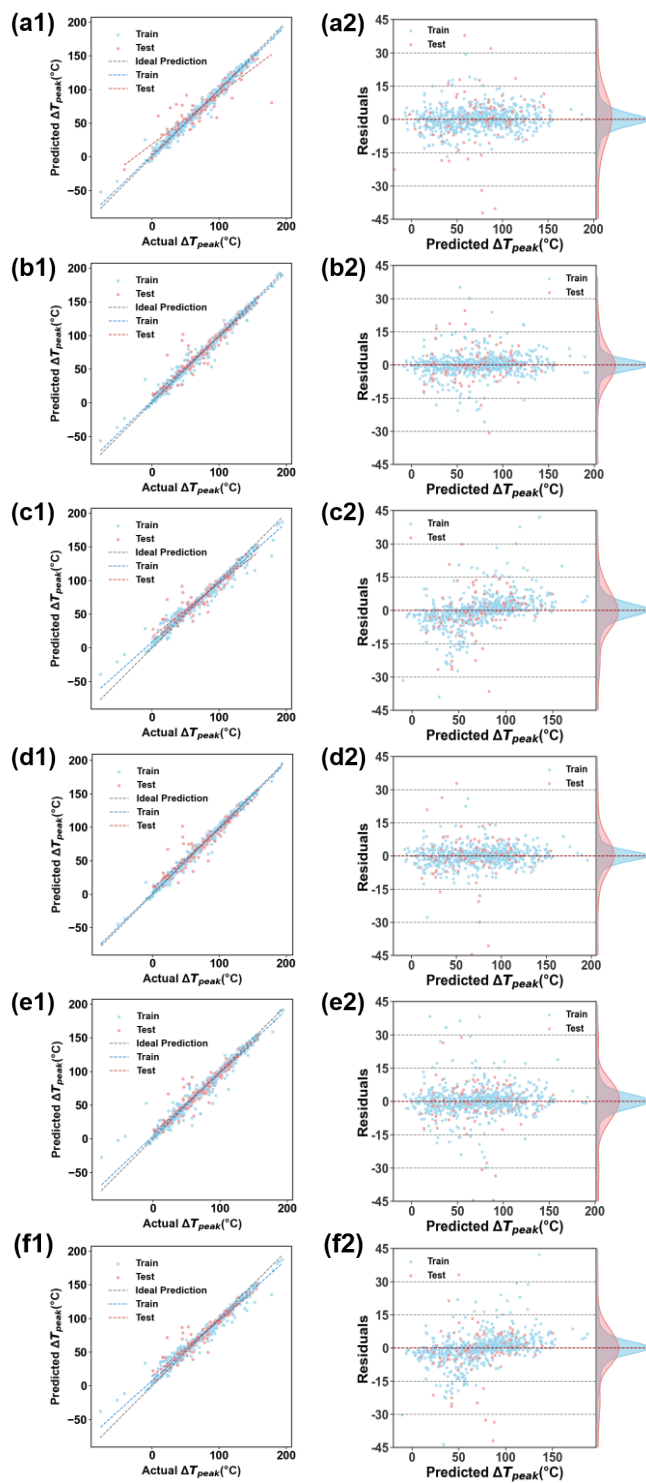

**Fig. S15** Performance of non-optimal  $\Delta T_p$  prediction models constructed using EXP XRD data. Each subplot includes a scatter plot of predicted vs. actual values (left) and residual distribution (right), corresponding to: (a) NMF+XGB, (b) NMF+LGBM, (c) NMF+RF, (d) kPCA+XGB, (e) kPCA+LGBM, (f) kPCA+RF.

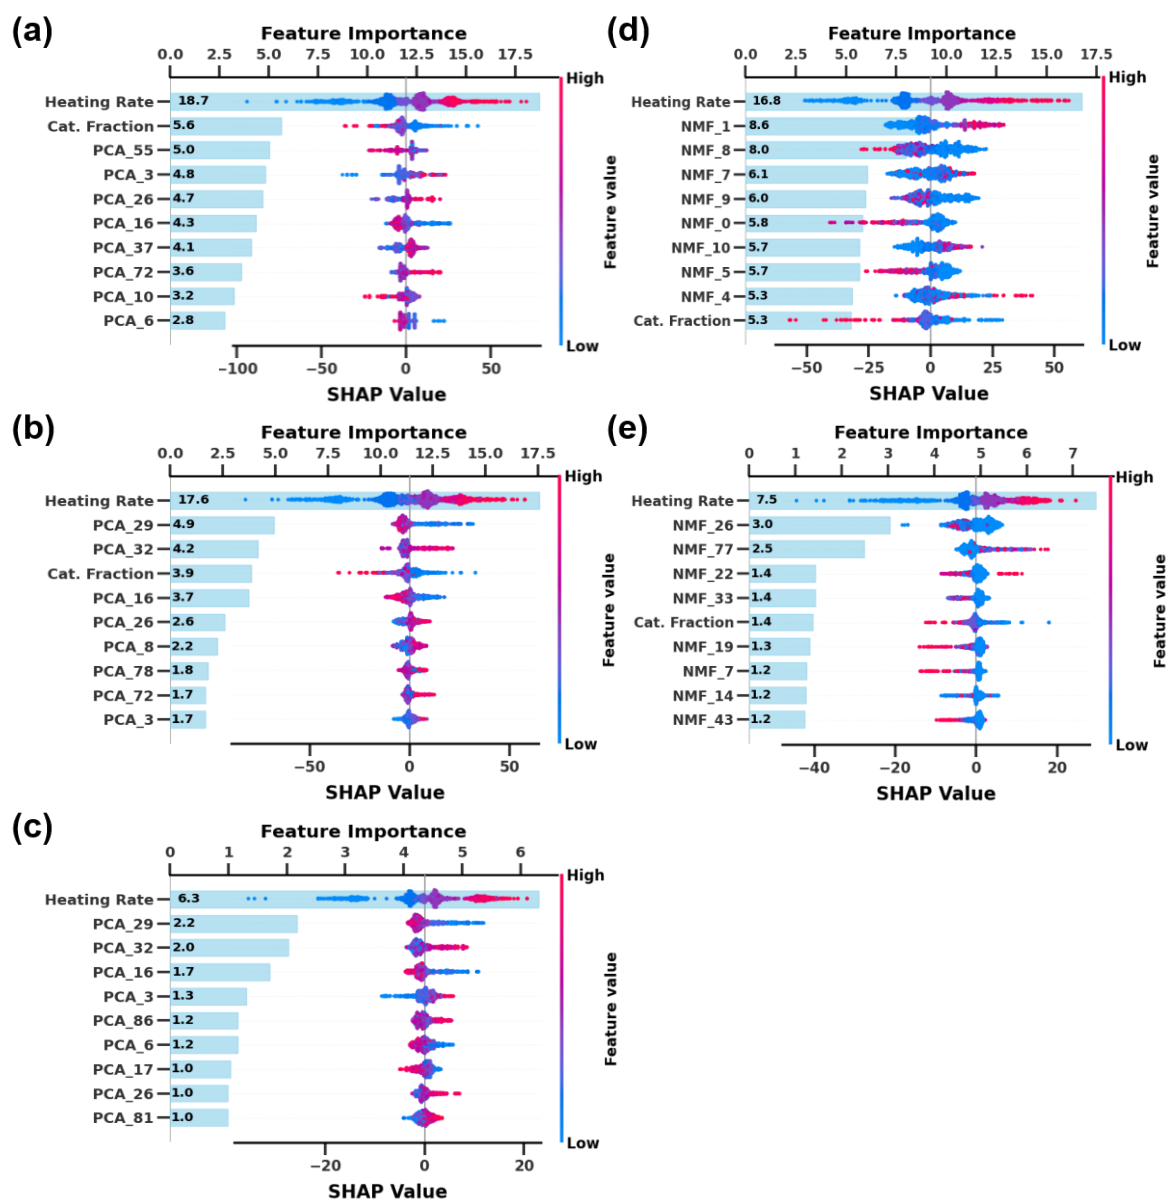

**Fig. S16** Feature importance (bar plots) and SHAP analysis (dot plots) of suboptimal Tp models constructed using ICDD XRD data:(a) kPCA+XGB, (b) kPCA+LGBM, (c) kPCA+RF, (d) NMF+XGB, (e) NMF+RF.

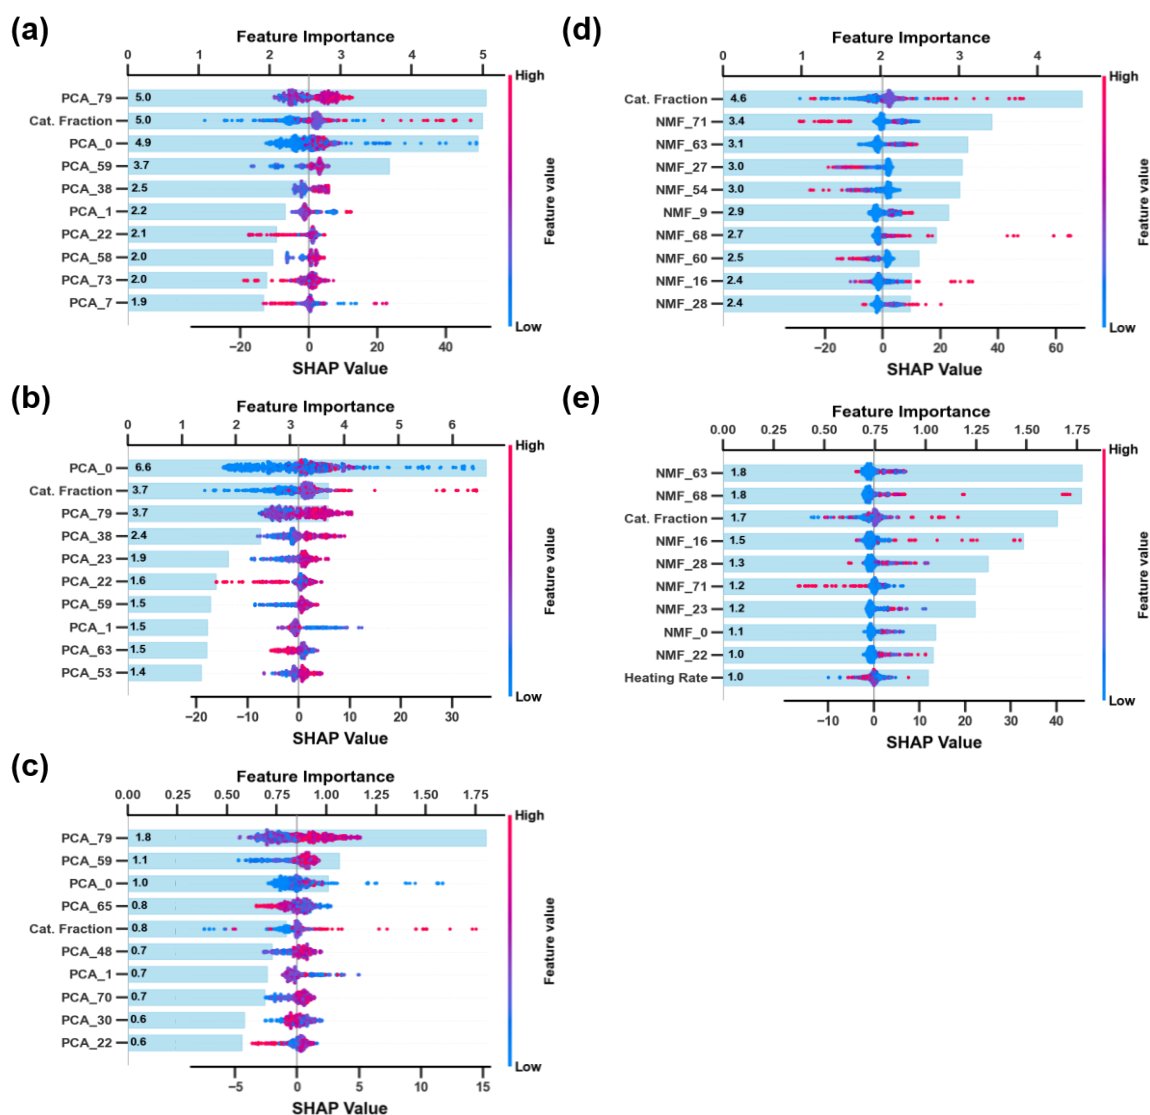

**Fig. S17** Feature importance (bar plots) and SHAP analysis (dot plots) for  $\Delta T_p$  prediction models constructed using ICDD XRD data: (a) kPCA+XGB, (b) kPCA+LGBM, (c) kPCA+RF (d) NMF+LGBM, (e) NMF+RF.



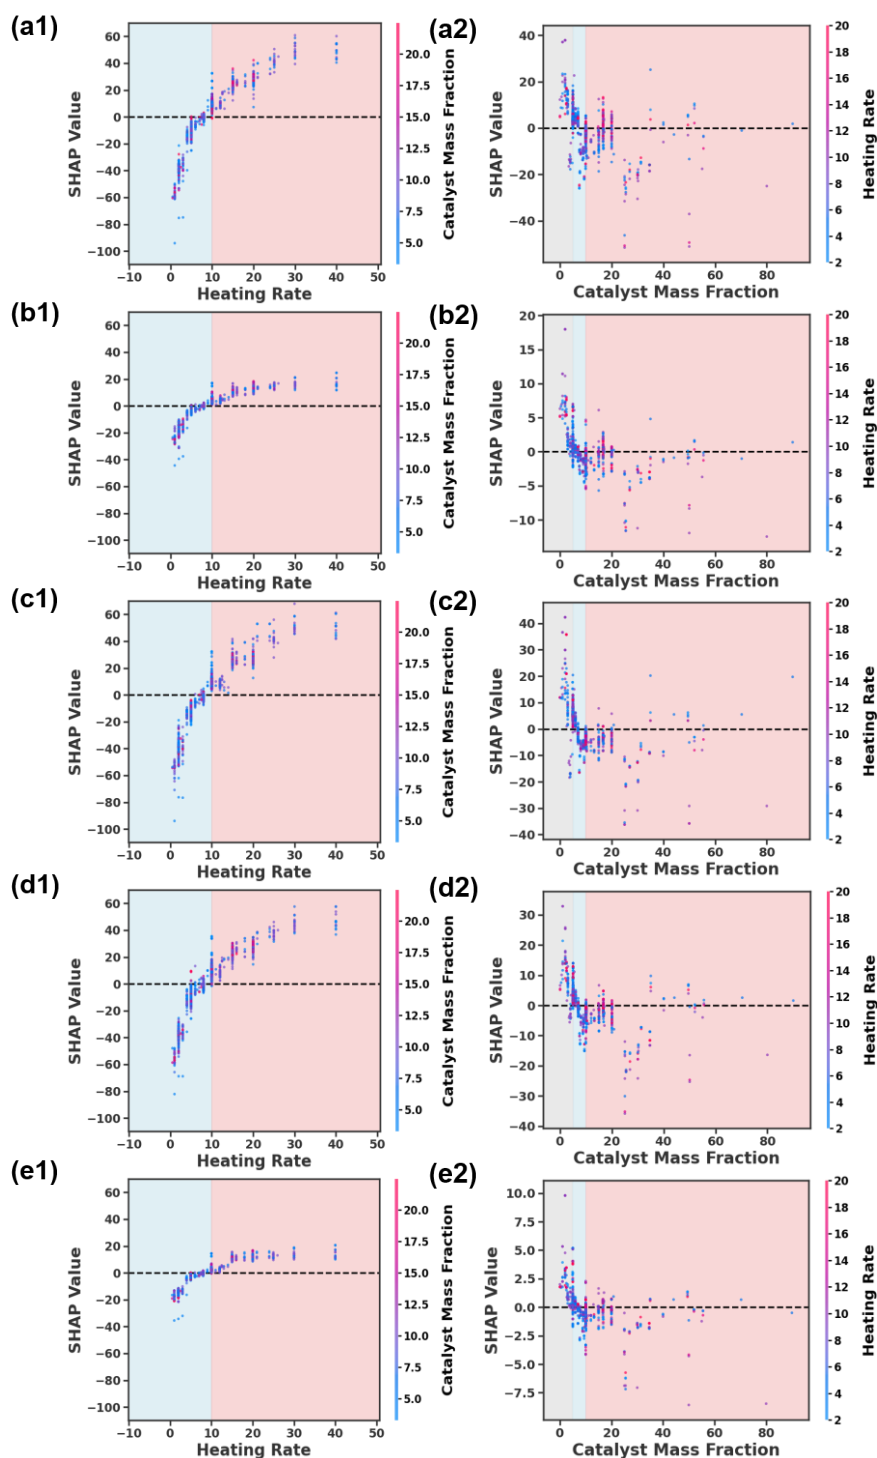

**Fig. S18** Univariate SHAP analysis of non-optimal  $T_p$  prediction models constructed using ICDD XRD data. Each subplot includes SHAP dependence plots for heating rate (left) and catalyst loading (right), corresponding to: (a) NMF+XGB, (b) NMF+RF, (c) kPCA+XGB, (d) kPCA+LGBM, (e) kPCA+RF.

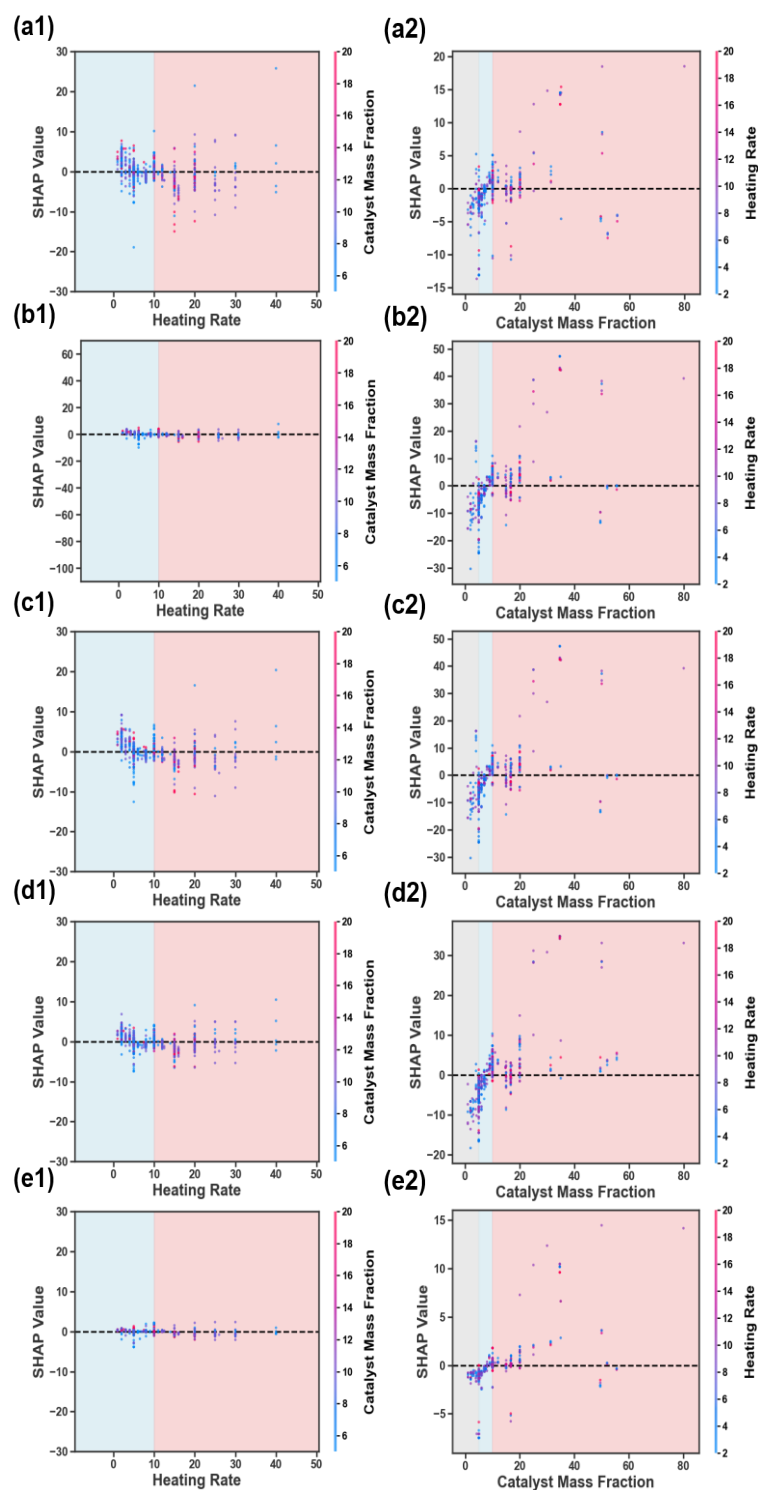

**Fig. S19** Univariate SHAP analysis of  $\Delta T_p$  prediction models constructed using ICDD XRD data. Each subplot includes SHAP dependence plots for heating rate (left) and catalyst loading (right), corresponding to: (a) NMF+LGBM, (b) NMF+RF, (c) kPCA+XGB, (d) kPCA+LGBM, (e) kPCA+RF.

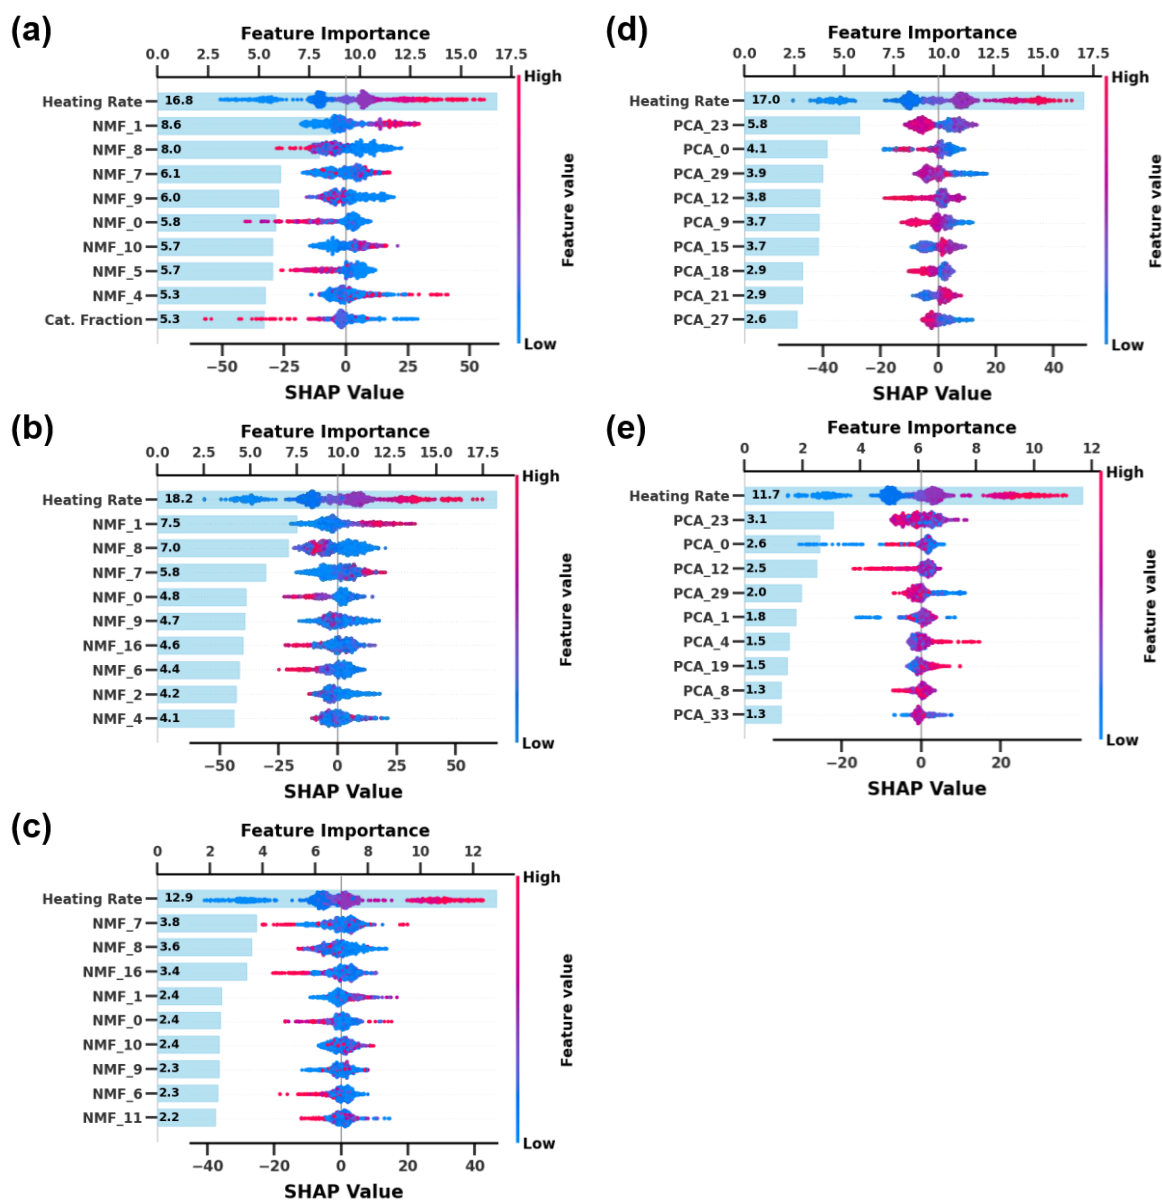

**Fig. S20** Feature importance (bar plots) and SHAP analysis (dot plots) of Tp prediction models based on EXP XRD data, constructed using: (a) NMF+XGB, (b) NMF+LGBM, (c) NMF+RF, (d) kPCA+LGBM, (e) kPCA+RF.

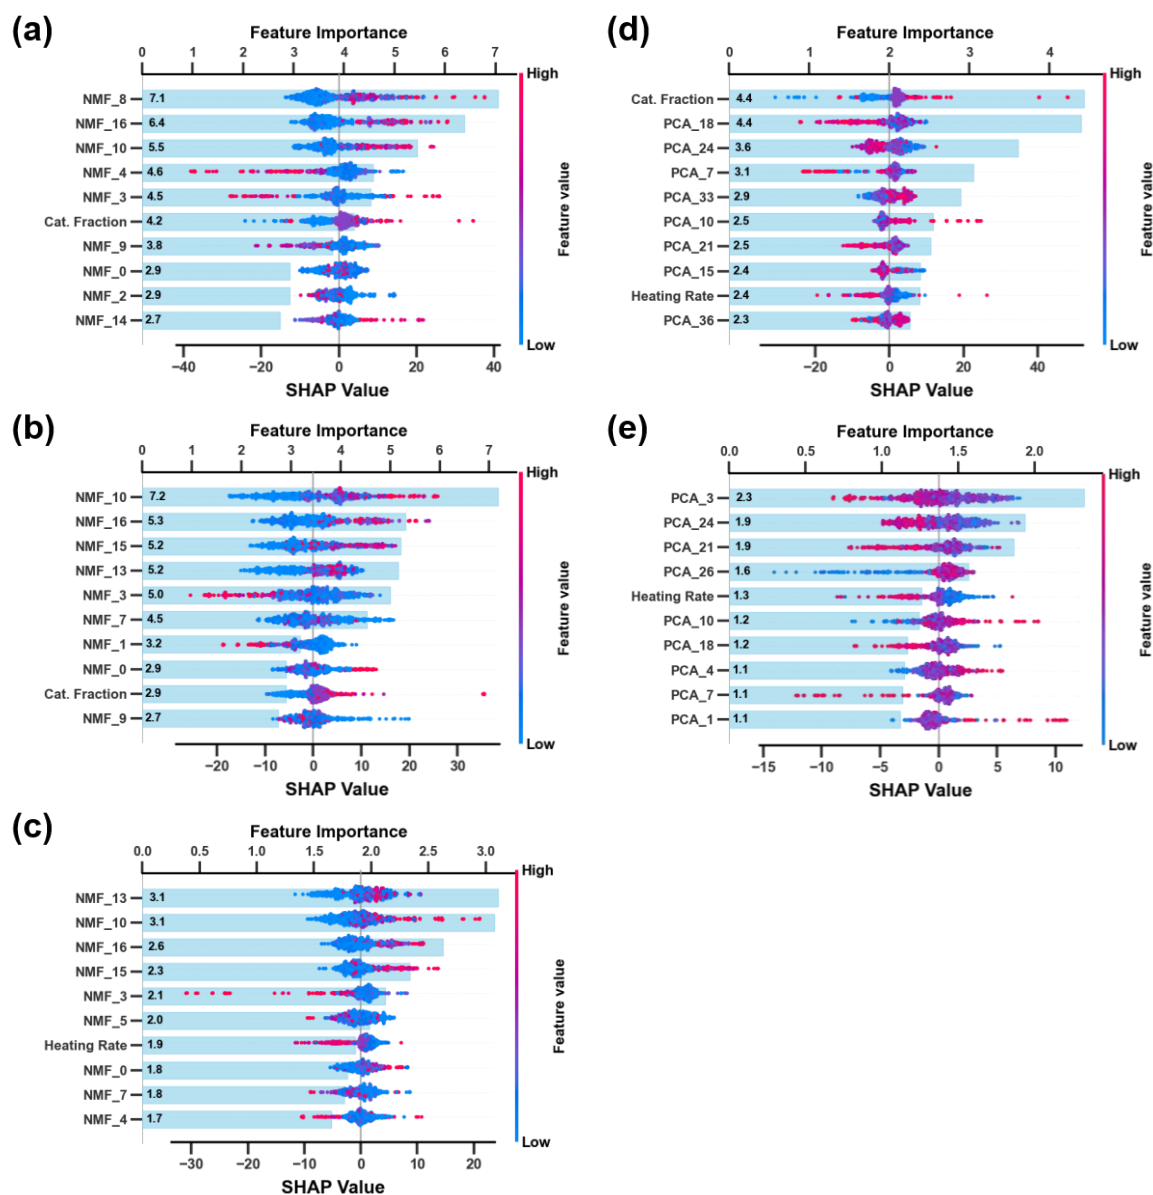

**Fig. S21** Feature importance (bar plots) and SHAP analysis (dot plots) of  $\Delta T_p$  prediction models based on EXP XRD data, constructed using: (a) NMF+XGB, (b) NMF+LGBM, (c) NMF+RF, (d) kPCA+XGB, (e) kPCA+RF.

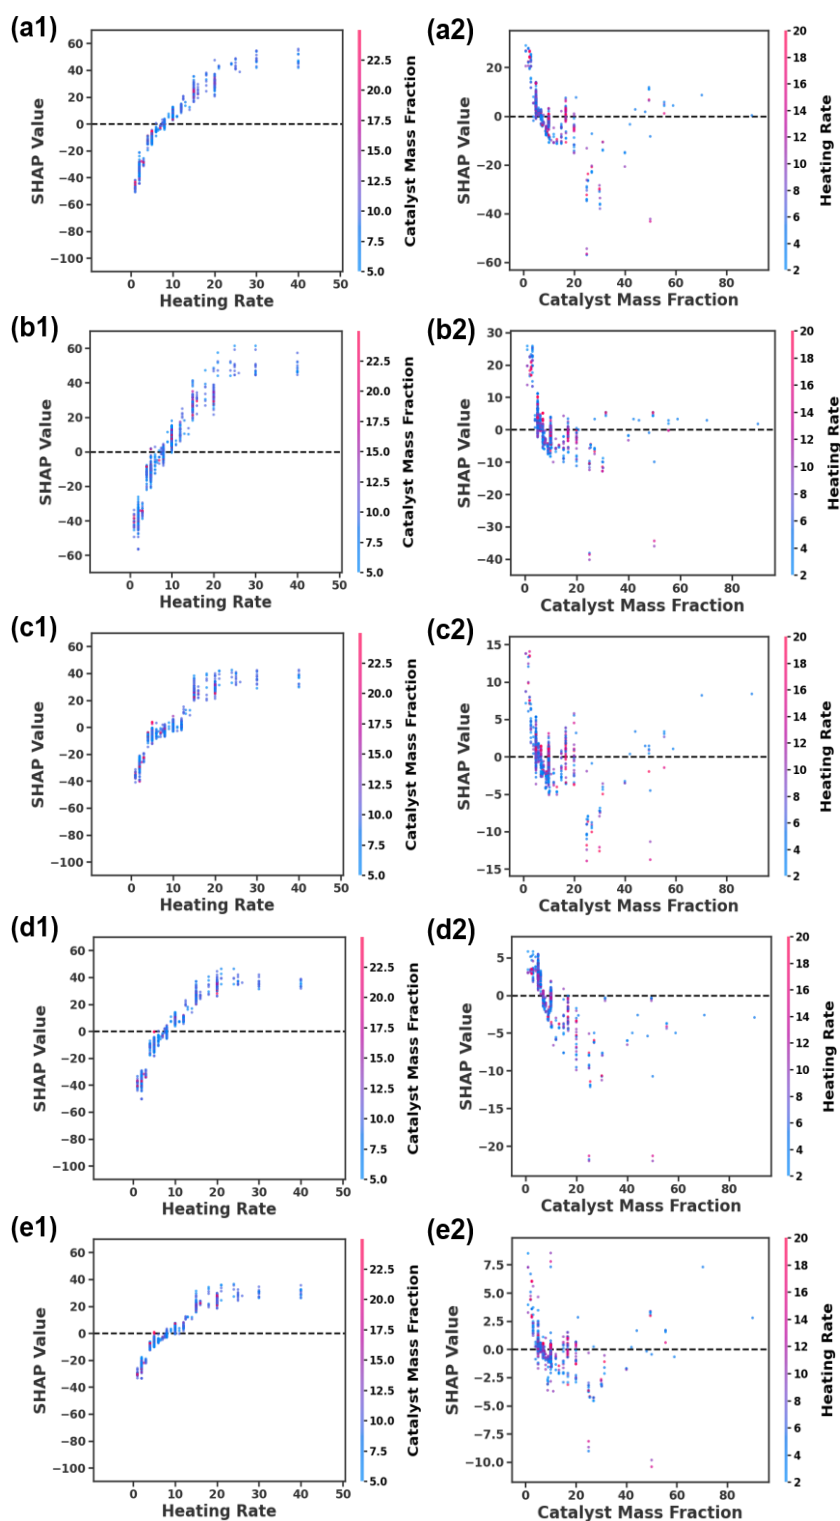

**Fig. S22** Univariate SHAP analysis of  $T_p$  prediction models based on EXP XRD data. Each subfigure includes heating rate analysis (left) and catalyst loading analysis (right), corresponding to: (a) NMF+XGB, (b) NMF+LGBM, (c) NMF+RF, (d) kPCA+LGBM, (e) kPCA+RF.

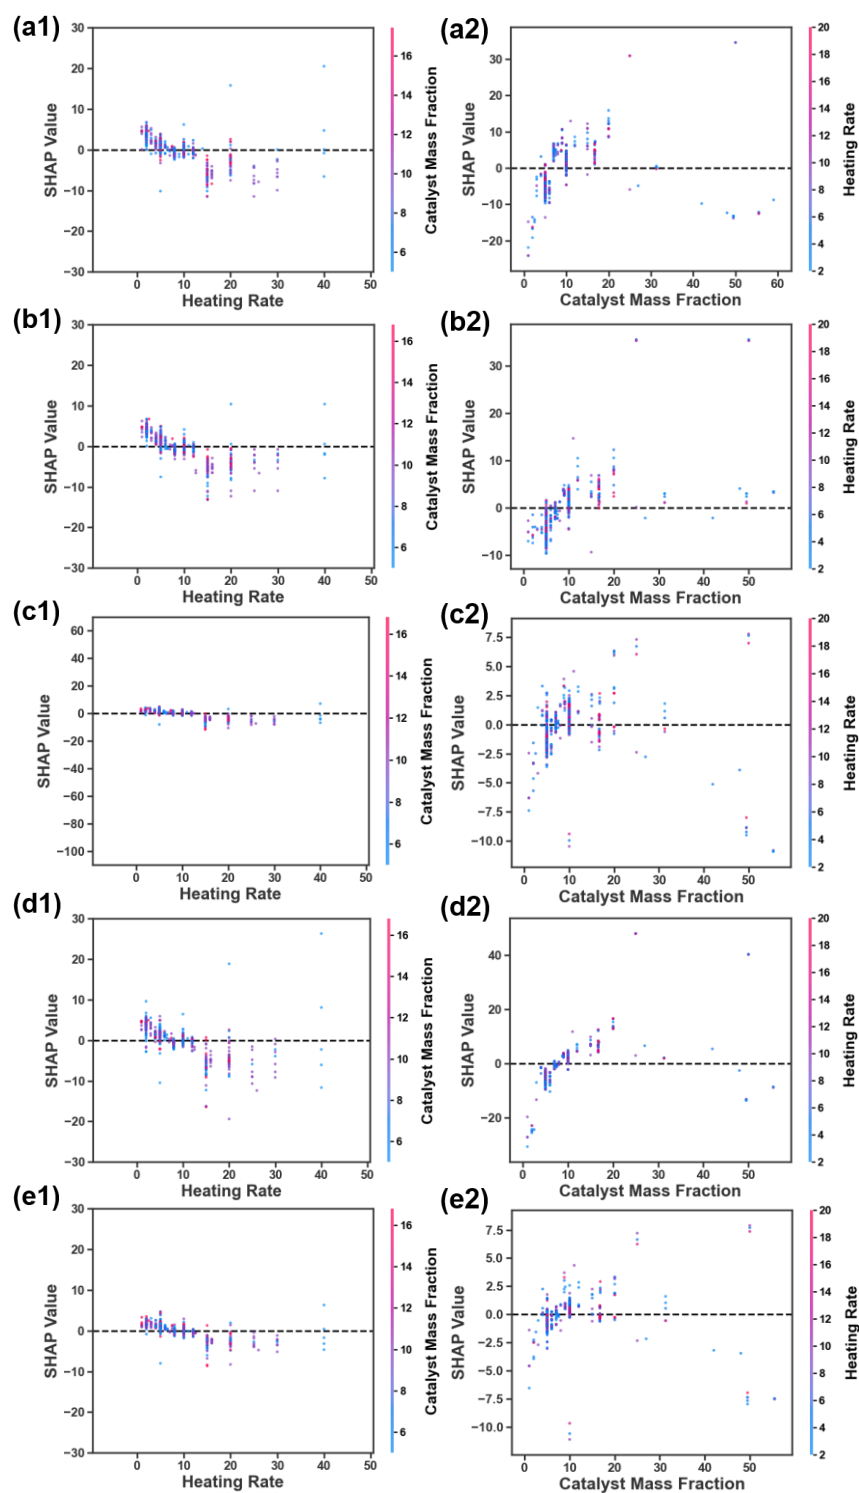

**Fig. S23** Univariate SHAP analysis of  $\Delta T_p$  prediction models based on experimental XRD data. Each subfigure includes heating rate analysis (left) and catalyst loading analysis (right), corresponding to: (a) NMF+XGB, (b) NMF+LGBM, (c) NMF+RF, (d) kPCA+XGB, (e) kPCA+LGBM, and (f) kPCA+RF.



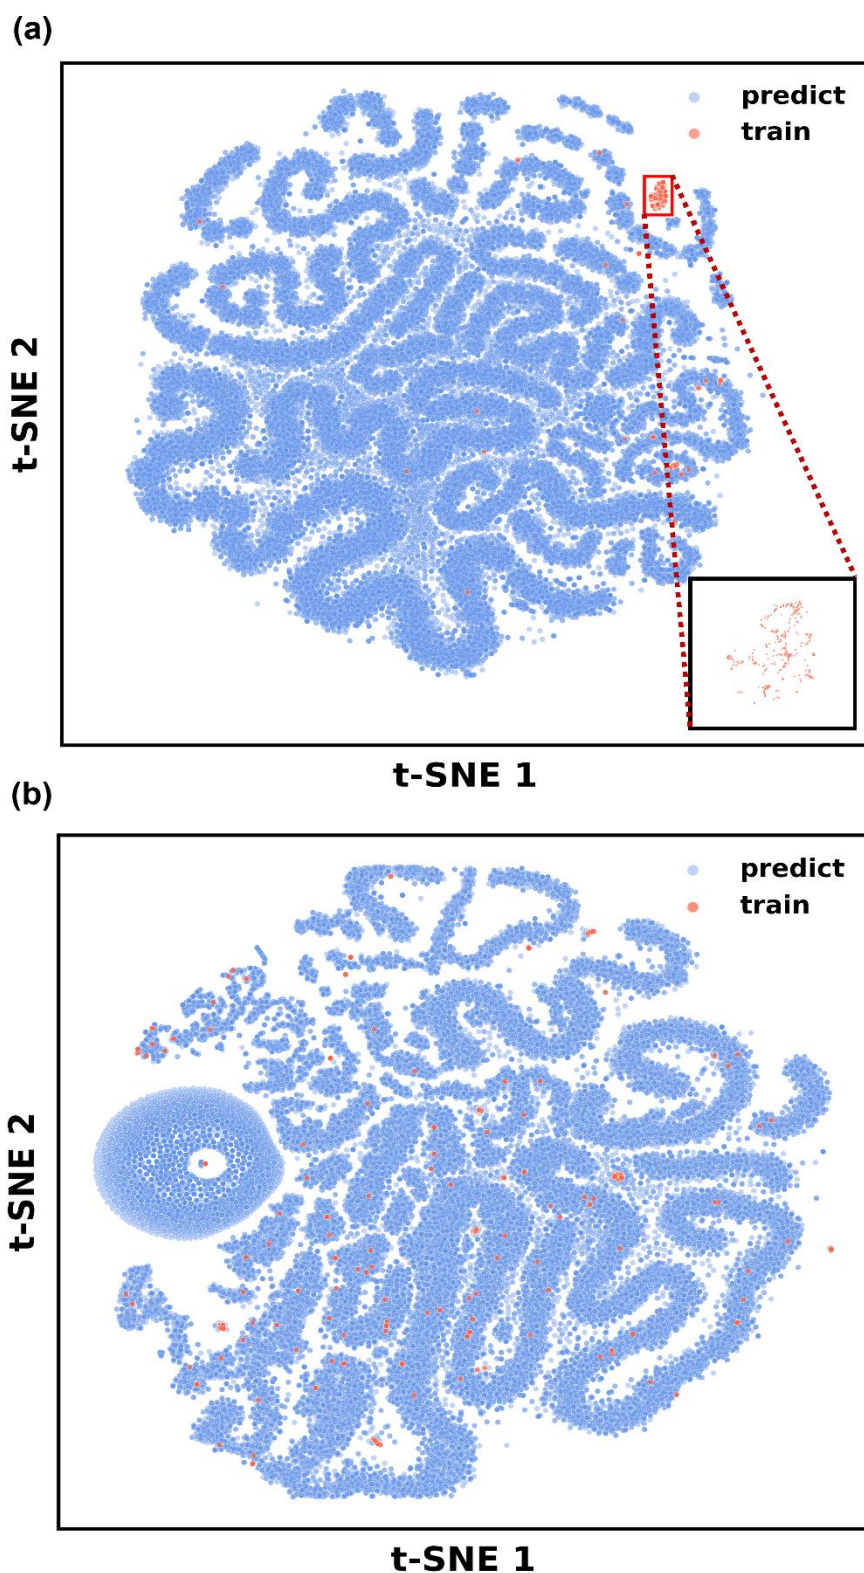

**Fig. S24** (a) Distribution of the prediction set (blue), constructed by augmenting ICDD XRD with simulated experimental factors (such as grain refinement, etc.), and the training set (red) based on EXP XRD. The bottom left shows a magnified view of the region highlighted by the red box. (b) Distribution of the training set (red) using ICDD XRD as features, and the corresponding prediction set (blue).

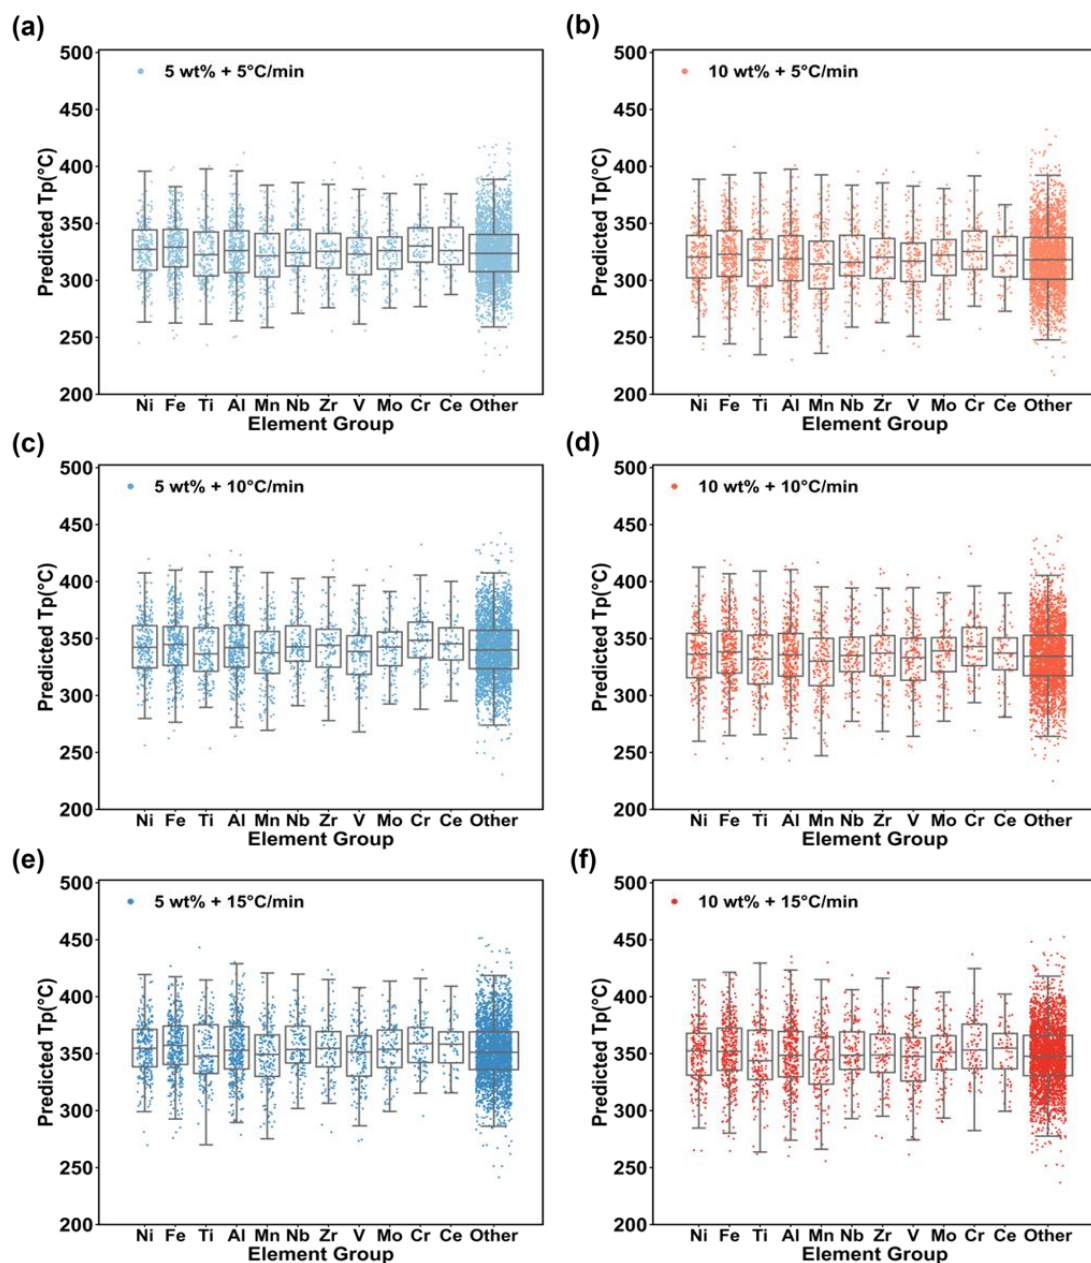

**Fig. S25** Predicted results for 5,000 materials under 6 common environmental condition combinations.



## Supplementary Tables

**Table S1** MAE of Different Interpolation Methods on ICDD XRD Data at Various Step Sizes.

| step | linear   | nearest  | cubic    |
|------|----------|----------|----------|
| 0.01 | 2.94E-21 | 2.52E-07 | 6.68E-10 |
| 0.02 | 4.33E-10 | 5.04E-07 | 1.47E-07 |
| 0.03 | 0.013    | 0.058    | 0.004    |
| 0.04 | 0.015    | 0.087    | 0.002    |
| 0.05 | 0.032    | 0.104    | 0.008    |
| 0.06 | 0.039    | 0.116    | 0.012    |
| 0.07 | 0.060    | 0.148    | 0.024    |
| 0.08 | 0.069    | 0.173    | 0.037    |
| 0.09 | 0.093    | 0.194    | 0.056    |
| 0.1  | 0.102    | 0.205    | 0.071    |

**Table S2** MAE of Different Interpolation Methods on EXP XRD Data at Various Step Sizes.

| step | linear | quadratic | cubic |
|------|--------|-----------|-------|
| 0.1  | 0.019  | 0.020     | 0.020 |
| 0.09 | 0.018  | 0.019     | 0.019 |
| 0.08 | 0.017  | 0.018     | 0.018 |
| 0.07 | 0.016  | 0.017     | 0.017 |
| 0.06 | 0.015  | 0.015     | 0.016 |
| 0.05 | 0.014  | 0.014     | 0.014 |
| 0.04 | 0.012  | 0.012     | 0.012 |
| 0.03 | 0.011  | 0.010     | 0.011 |
| 0.02 | 0.008  | 0.008     | 0.008 |
| 0.01 | 0.005  | 0.005     | 0.005 |

**Table S3** Fit Metrics, Error Metrics, and Residual Analysis Metrics for Training Set, Test Set, and 10-Fold-Cross-Validation after Hyperparameter Tuning for Various Dimensionality Reduction Methods and Model Combinations Based on ICDD XRD Data.

| Model    | Metric         | Tp(°C) |        |         | $\Delta$ Tp(°C) |       |         |
|----------|----------------|--------|--------|---------|-----------------|-------|---------|
|          |                | Train  | Test   | 10 Fold | Train           | Test  | 10 Fold |
| NMF+XGB  | R <sup>2</sup> | 0.961  | 0.818  | 0.823   | 0.984           | 0.789 | 0.775   |
|          | RMSE           | 11.64  | 22.89  | 24.15   | 5.01            | 15.8  | 18.9    |
|          | MAE            | 6.25   | 14.92  | 14.79   | 1.44            | 11.24 | 11.45   |
|          | Mean resid     | 0      | -4.28  | —       | 0               | 0.08  | —       |
|          | Std Dev resid  | 11.63  | 22.48  | —       | 5.01            | 15.8  | —       |
|          | Skewn resid    | 0.17   | -1.37  | —       | -5.04           | -0.72 | —       |
| NMF+LGBM | R <sup>2</sup> | 0.968  | 0.848  | 0.822   | 0.984           | 0.762 | 0.752   |
|          | RMSE           | 10.64  | 20.9   | 24.29   | 5.03            | 21.26 | 19.25   |
|          | MAE            | 5.36   | 12.74  | 14.630  | 2.62            | 12.36 | 11.42   |
|          | Mean resid     | 0      | -3.13  | —       | 0               | -1.87 | —       |
|          | Std Dev resid  | 10.63  | 20.66  | —       | 5.03            | 21.18 | —       |
|          | Skewn resid    | -0.04  | -1.91  | —       | -0.92           | -1.64 | —       |
| NMF+RF   | R <sup>2</sup> | 0.91   | 0.808  | 0.775   | 0.959           | 0.718 | 0.777   |
|          | RMSE           | 17.71  | 23.5   | 27.5    | 8.05            | 23.15 | 18.4    |
|          | MAE            | 12.44  | 16.88  | 19.74   | 4.89            | 14.25 | 11.97   |
|          | Mean resid     | 0.47   | -3.94  | —       | -0.29           | -2.4  | —       |
|          | Std Dev resid  | 17.71  | 23.16  | —       | 8.05            | 23.02 | —       |
|          | Skewn resid    | 0.71   | -0.54  | —       | -0.52           | -1.01 | —       |
| kPCA+XGB | R <sup>2</sup> | 0.946  | 0.831  | 0.804   | 0.975           | 0.741 | 0.75    |
|          | RMSE           | 13.82  | 22.06  | 26.1    | 6.3             | 22.2  | 19.61   |
|          | MAE            | 8.78   | 14.13  | 15.84   | 3.72            | 13.12 | 11.51   |
|          | Mean resid     | 0.000  | -2.380 | —       | 0               | -0.59 | —       |

|           |                |        |        |       |        |        |       |
|-----------|----------------|--------|--------|-------|--------|--------|-------|
| kPCA+LGBM | Std Dev resid  | 13.820 | 21.930 | —     | 6.3    | 22.19  | —     |
|           | Skewn resid    | 0.220  | -0.850 | —     | -0.63  | -0.6   | —     |
|           | R <sup>2</sup> | 0.959  | 0.840  | 0.802 | 0.966  | 0.735  | 0.769 |
|           | RMSE           | 12.000 | 21.400 | 25.74 | 7.340  | 22.46  | 18.78 |
|           | MAE            | 6.810  | 14.160 | 16.36 | 3.9    | 13.49  | 11.36 |
|           | Mean resid     | 0      | -2.23  | —     | 0.000  | -1.320 | —     |
|           | Std Dev resid  | 11.99  | 21.29  | —     | 7.340  | 24.420 | —     |
| kPCA+RF   | Skewn resid    | 0.21   | -1.29  | —     | -0.020 | -0.750 | —     |
|           | R <sup>2</sup> | 0.888  | 0.789  | 0.746 | 0.886  | 0.684  | 0.735 |
|           | RMSE           | 19.78  | 24.6   | 29.3  | 13.47  | 24.73  | 20.23 |
|           | MAE            | 13.69  | 17.73  | 21.2  | 8.47   | 15.160 | 13.93 |
|           | Mean resid     | 0.43   | -4.48  | —     | -0.21  | -1.66  | —     |
|           | Std Dev resid  | 19.78  | 24.19  | —     | 13.47  | 26.67  | —     |
|           | Skewn resid    | 0.65   | -0.51  | —     | -0.75  | -1.34  | —     |

---

**Table S4** Fitting metrics, error metrics, and residual analysis results for combinations of dimensionality reduction methods and regression models based on EXP XRD data, evaluated on the training set, test set, and 10-fold cross-validation after hyperparameter optimization.

| Model    | Metric         | Tp(°C) |        |         | $\Delta$ Tp(°C) |        |         |
|----------|----------------|--------|--------|---------|-----------------|--------|---------|
|          |                | Train  | Test   | 10 Fold | Train           | Test   | 10 Fold |
| NMF+XGB  | R <sup>2</sup> | 0.974  | 0.852  | 0.864   | 0.984           | 0.805  | 0.765   |
|          | RMSE           | 8.035  | 19.496 | 20.285  | 4.829           | 18.063 | 17.772  |
|          | MAE            | 3.517  | 11.134 | 11.662  | 3.28            | 10.761 | 10.077  |
|          | Mean resid     | 0      | -1.23  | —       | 0               | -0.33  | —       |
|          | Std Dev resid  | 8.03   | 19.46  | —       | 4.83            | 18.06  | —       |
|          | Skewn resid    | 0.19   | -0.52  | —       | -0.19           | 1.29   | —       |
| NMF+LGBM | R <sup>2</sup> | 0.976  | 0.851  | 0.851   | 0.981           | 0.86   | 0.783   |
|          | RMSE           | 7.093  | 19.597 | 21.537  | 5.278           | 12.523 | 17.599  |
|          | MAE            | 3.555  | 12.814 | 13.766  | 3.049           | 7.302  | 9.89    |
|          | Mean_resid     | 0      | -2.18  | —       | 0               | -1.63  | —       |
|          | Std Dev_resid  | 7.09   | 19.47  | —       | 5.28            | 12.42  | —       |
|          | Skewn_resid    | -2.42  | -0.28  | —       | -0.5            | -2.16  | —       |
| NMF+RF   | R <sup>2</sup> | 0.937  | 0.728  | 0.784   | 0.968           | 0.859  | 0.785   |
|          | RMSE           | 14.266 | 26.424 | 26.076  | 6.883           | 13.025 | 17.726  |
|          | MAE            | 9.768  | 18.759 | 18.706  | 4.183           | 8.677  | 11.157  |
|          | Mean_resid     | 0.24   | -3.25  | —       | -0.26           | -2.11  | —       |
|          | Std Dev_resid  | 14.26  | 26.22  | —       | 6.88            | 12.85  | —       |
|          | Skewn_resid    | 1.06   | 0.11   | —       | -0.28           | -1.28  | —       |
| kPCA+XGB | R <sup>2</sup> | 0.975  | 0.88   | 0.88    | 0.985           | 0.865  | 0.814   |
|          | RMSE           | 7.593  | 17.551 | 18.89   | 3.857           | 12.767 | 16.329  |
|          | MAE            | 2.923  | 9.935  | 10.919  | 2.625           | 7.73   | 9.118   |
|          | Mean_resid     | 0      | -0.99  | —       | 0               | -1.22  | —       |

|           |                |        |        |        |       |        |        |
|-----------|----------------|--------|--------|--------|-------|--------|--------|
| kPCA+LGBM | Std Dev_resid  | 7.59   | 17.52  | —      | 3.86  | 12.71  | —      |
|           | Skewn_resid    | 0.02   | 0.8    | —      | 0.25  | -1.61  | —      |
|           | R <sup>2</sup> | 0.977  | 0.88   | 0.869  | 0.965 | 0.885  | 0.788  |
|           | RMSE           | 8.57   | 17.526 | 19.949 | 7.204 | 11.797 | 17.452 |
|           | MAE            | 4.993  | 10.976 | 12.149 | 3.938 | 7.738  | 9.767  |
|           | Mean_resid     | 0.06   | -0.18  | —      | 0.01  | -1.44  | —      |
|           | Std Dev_resid  | 8.57   | 17.53  | —      | 7.2   | 11.71  | —      |
|           | Skewn_resid    | -0.51  | 0.17   | —      | -1.32 | -1.35  | —      |
|           | R <sup>2</sup> | 0.963  | 0.809  | 0.82   | 0.97  | 0.865  | 0.807  |
|           | RMSE           | 10.873 | 22.159 | 23.7   | 6.647 | 12.751 | 16.741 |
| kPCA+RF   | MAE            | 6.518  | 15.458 | 16.088 | 4.026 | 8.263  | 10.479 |
|           | Mean_resid     | 0.34   | -1.48  | —      | -0.37 | -2.58  | —      |
|           | Std Dev_resid  | 10.87  | 22.11  | —      | 6.64  | 12.49  | —      |
|           | Skewn_resid    | 0.86   | 0.43   | —      | -0.47 | -1.2   | —      |
|           |                |        |        |        |       |        |        |

---

**Table S5** Evaluation metrics of the ensemble models trained using Materials Project features.

| Model | Metric         | Tp      |         | $\Delta$ Tp |         |
|-------|----------------|---------|---------|-------------|---------|
|       |                | Train   | Test    | Train       | Test    |
| LGBM  | R <sup>2</sup> | 0.9648  | 0.7286  | 0.9719      | 0.7678  |
|       | RMSE           | 4.2467  | 31.3495 | 0.4521      | 20.2632 |
|       | MAE            | 6.449   | 21.2871 | 4.0237      | 13.7961 |
| RF    | R <sup>2</sup> | 0.844   | 0.6485  | 0.8324      | 0.6857  |
|       | RMSE           | 23.2067 | 35.6792 | 16.9013     | 23.5751 |
|       | MAE            | 16.6152 | 26.4776 | 11.9954     | 17.5439 |
| XGB   | R <sup>2</sup> | 0.9792  | 0.7616  | 0.9892      | 0.81    |
|       | RMSE           | 8.4748  | 29.3825 | 4.2864      | 18.3265 |
|       | MAE            | 5.3128  | 19.5527 | 2.9031      | 12.812  |

**Table S6** Evaluation metrics of the 1D-CNN models trained on ICDD-XRD and EXP-XRD datasets.

| Model | Metric         | Tp(°C) |       | $\Delta$ Tp(°C) |       |
|-------|----------------|--------|-------|-----------------|-------|
|       |                | Train  | Test  | Train           | Test  |
| ICDD  | R <sup>2</sup> | 0.83   | 0.77  | 0.89            | 0.72  |
|       | MAE            | 15.36  | 16.23 | 8.34            | 14.32 |
| EXP   | R <sup>2</sup> | 0.82   | 0.74  | 0.86            | 0.71  |
|       | MAE            | 15.74  | 16.65 | 8.97            | 14.66 |



**Table S7** Evaluation metrics for the ablation configuration with XRD-derived features removed

| Model | Split   | R <sup>2</sup> | MAE    | RMSE   |
|-------|---------|----------------|--------|--------|
| XGB   | Train   | 0.448          | 33.544 | 42.182 |
|       | Test    | 0.158          | 37.852 | 46.509 |
|       | 10 Fold | 0.363          | 36.254 | 45.113 |
| LGBM  | Train   | 0.457          | 32.493 | 41.85  |
|       | Test    | 0.087          | 39.734 | 48.418 |
|       | 10 Fold | 0.325          | 37.246 | 46.433 |
| RF    | Train   | 0.423          | 34.393 | 43.135 |
|       | Test    | 0.121          | 38.951 | 47.513 |
|       | 10 Fold | 0.345          | 36.986 | 45.745 |

**Table S8** Comparison between the predictions of the EXP XRD model and new experimental data reported in 2025 that are not included in the training dataset.

| Formula                           | Catalyst Mass<br>Fraction(wt%) | Heating<br>Rate(°C/min) | Experimental Tp(°C) | Predicted<br>Tp(°C) | Ref. |
|-----------------------------------|--------------------------------|-------------------------|---------------------|---------------------|------|
| FeMoO@NCN                         | 10                             | 3                       | 270.1               | 290.8               | [11] |
|                                   |                                | 5                       | 278.5               | 298.6               |      |
|                                   |                                | 7                       | 289.4               | 316.4               |      |
|                                   |                                | 10                      | 295.1               | 320.5               |      |
| NCN                               | 10                             | 3                       | 335.3               | 346.9               | [11] |
|                                   |                                | 5                       | 341.2               | 352.3               |      |
|                                   |                                | 7                       | 360.5               | 380.3               |      |
|                                   |                                | 10                      | 369.7               | 389.9               |      |
| Co/C                              | 10                             | 5                       | 323.2               | 313.5               | [12] |
|                                   |                                | 8                       | 329.9               | 321.9               |      |
|                                   |                                | 10                      | 335.3               | 327.2               |      |
|                                   |                                | 12                      | 341.2               | 335.7               |      |
| Ti <sub>2</sub> NTx               | 10                             | 9                       | 374                 | 383.4               | [13] |
|                                   |                                | 12                      | 382.3               | 403.7               |      |
|                                   |                                | 15                      | 392.1               | 407.4               |      |
|                                   |                                | 20                      | 400.1               | 415.5               |      |
| TiO <sub>2</sub> -C-Ni            | 8                              | 5                       | 245                 | 228.2               | [14] |
|                                   |                                | 8                       | 258.5               | 238                 |      |
|                                   |                                | 10                      | 266.8               | 251                 |      |
|                                   |                                | 13                      | 277.7               | 275.6               |      |
| Ni(HCOO) <sub>2</sub> -300rpm+TPF | 10                             | 5                       | 275                 | 296.8               | [15] |
| Ni(HCOO) <sub>2</sub> -500rpm     | 10                             | 5                       | 279                 | 260.5               |      |
| (NiHCOO) <sub>2</sub> -300rpm     | 10                             | 5                       | 312                 | 337.3               |      |
| NF                                | 10                             | 10                      | 335.2               | 342.5               |      |
| NF-200                            | 10                             | 10                      | 325.7               | 354.2               | [16] |
| NF-300                            | 10                             | 10                      | 319.2               | 322.3               |      |
| NF-400                            | 10                             | 10                      | 327.3               | 320.5               |      |
| NF-500                            | 10                             | 10                      | 356.8               | 382.7               |      |
| VNbC                              | 5                              | 5                       | 235                 | 211.6               | [17] |
|                                   |                                | 10                      | 263                 | 243.9               |      |
| Ni/NiO@C                          | 10                             | 5                       | 212.8               | 247.5               | [18] |
|                                   |                                | 5                       | 307.3               | 285                 |      |
| Ni@SC                             | 5                              | 10                      | 332.7               | 319.2               | [19] |
|                                   |                                | 15                      | 347.3               | 339.4               |      |
|                                   |                                | 20                      | 360.5               | 350.7               |      |
| FeVO <sub>4</sub> /CNT            | 6                              | 5                       | 307.3               | 314.9               | [20] |
|                                   |                                | 10                      | 332.7               | 348.5               |      |
|                                   |                                | 15                      | 338.8               | 349.7               |      |

|                        |    |    |       |       |      |
|------------------------|----|----|-------|-------|------|
|                        |    | 20 | 342.6 | 352   |      |
|                        |    | 2  | 256.9 | 289.6 |      |
| NiO                    | 5  | 5  | 277.9 | 315.1 | [21] |
|                        |    | 8  | 291.7 | 335.6 |      |
|                        |    | 10 | 302.9 | 349.8 |      |
|                        |    | 5  | 351.3 | 363   |      |
| CuMoO <sub>4</sub>     | 15 | 8  | 359.8 | 368.3 | [22] |
|                        |    | 10 | 367.5 | 383.8 |      |
|                        | 3  |    | 307.3 | 329.7 |      |
| TiO <sub>2</sub> /C/Ni | 5  |    | 294.8 | 313   |      |
|                        | 8  | 10 | 266.8 | 293.4 | [23] |
|                        | 10 |    | 257.6 | 272.9 |      |
| Ni&C                   | 10 | 5  | 320.5 | 344.1 | [24] |

---

**Table S9** Promising catalyst candidates for MgH<sub>2</sub> dehydrogenation identified by high-throughput prediction.

| Formula                                          | Catalyst Mass Fraction(wt%) | Heating Rate(°C/min) | Predicted Tp(°C) |
|--------------------------------------------------|-----------------------------|----------------------|------------------|
| CaFe <sub>4</sub> O <sub>7</sub>                 | 10                          | 2                    | 197.0            |
| NiZr <sub>2</sub>                                | 10                          | 2                    | 204.4            |
| Ru <sub>10</sub> Y <sub>10</sub> C <sub>19</sub> | 10                          | 2                    | 206.5            |
| NaFeF <sub>3</sub>                               | 10                          | 2                    | 215.2            |
| TbMn <sub>6</sub> Ge <sub>6</sub>                | 10                          | 2                    | 215.3            |
| Zn <sub>2</sub> Co <sub>3</sub> TeO <sub>8</sub> | 10                          | 5                    | 217.0            |
| Pr <sub>2</sub> O <sub>2</sub> SO <sub>4</sub>   | 10                          | 2                    | 217.3            |
| SnS <sub>2</sub>                                 | 5                           | 2                    | 218.9            |
| K <sub>2</sub> TiF <sub>6</sub>                  | 10                          | 2                    | 220.6            |
| SrZnO <sub>2</sub>                               | 10                          | 2                    | 220.8            |
| Bi <sub>4</sub> (GeO <sub>4</sub> ) <sub>3</sub> | 10                          | 2                    | 222.0            |
| Nd <sub>2</sub> Ti <sub>4</sub> O <sub>11</sub>  | 10                          | 2                    | 222.2            |
| Cu <sub>5</sub> V <sub>2</sub> O <sub>10</sub>   | 10                          | 2                    | 222.3            |

## Supplementary References

- [1] Z. Ding, H. Li, L. Shaw, New insights into the solid-state hydrogen storage of nanostructured LiBH<sub>4</sub>-MgH<sub>2</sub> system, *Chemical Engineering Journal* 385 (2020) 123856. <https://doi.org/10.1016/j.cej.2019.123856>.
- [2] W. Zhao, Y. Wu, P. Li, L. Jiang, X. Qu, Enhanced hydrogen storage properties of 1.1MgH<sub>2</sub> – 2LiNH<sub>2</sub> – 0.1LiBH<sub>4</sub> system with LaNi<sub>5</sub> -based alloy hydrides addition, *RSC Adv.* 8 (2018) 40647–40654. <https://doi.org/10.1039/C8RA07279E>.
- [3] H. Liu, X. Wang, Y. Liu, Z. Dong, G. Cao, S. Li, M. Yan, Improved hydrogen storage properties of MgH<sub>2</sub> by ball milling with AlH<sub>3</sub>: preparations, de/rehydriding properties, and reaction mechanisms, *J. Mater. Chem. A* 1 (2013) 12527. <https://doi.org/10.1039/c3ta11953j>.
- [4] C. Duan, M. Wu, Y. Cao, D. Fu, Y. Zhang, Z. Su, Z. Sun, Y. Wu, Novel core–shell structured MgH<sub>2</sub> /AlH<sub>3</sub> @CNT nanocomposites with extremely high dehydriding–rehydriding properties derived from nanoconfinement, *J. Mater. Chem. A* 9 (2021) 10921–10932. <https://doi.org/10.1039/D1TA01938D>.
- [5] H. Liu, X. Wang, Y. Liu, Z. Dong, S. Li, H. Ge, M. Yan, Microstructures and Hydrogen Desorption Properties of the MgH<sub>2</sub> –AlH<sub>3</sub> Composite with NbF<sub>5</sub> Addition, *J. Phys. Chem. C* 118 (2014) 18908–18916. <https://doi.org/10.1021/jp505064s>.
- [6] E.M. Dematteis, M. Baricco, Hydrogen Desorption in Mg(BH<sub>4</sub>)<sub>2</sub>-Ca(BH<sub>4</sub>)<sub>2</sub> System, *Energies* 12 (2019) 3230. <https://doi.org/10.3390/en12173230>.
- [7] C. Zuo, C. Zhang, Standardizing differential scanning calorimetry (DSC) thermal decomposition temperatures at various heating rates of an energetic material as a threshold one, *Energetic Materials Frontiers* (2024) S266664722400054X. <https://doi.org/10.1016/j.enmf.2024.06.006>.
- [8] L. Zhang, X. Zhang, W. Zhang, F. Fang, J. Li, J. Hu, C. Gu, W. Sun, M. Gao, H. Pan, Y. Liu, *In situ* creation of a catalytic multiphase and multiscale surroundings for remarkable hydrogen storage performance of MgH<sub>2</sub>, *J. Mater. Chem. A* 12 (2024) 2423–2434. <https://doi.org/10.1039/D3TA06754H>.
- [9] Q. Yuan, C. Peng, C. Yang, Y. Li, Q. Zhang, Y. Lv, G. Liu, D. Liu, Facilitated hydrogen storage properties of MgH<sub>2</sub> by Ni nanoparticles anchored on Mo<sub>2</sub>C@C nanosheets, *International Journal of Hydrogen Energy* 85 (2024) 12–19. <https://doi.org/10.1016/j.ijhydene.2024.08.292>.
- [10] T. Tian, X. Wang, K. Shi, F. Liu, J. Wang, X. Zhang, S. Li, W. Chen, Y. Song, J. Li, G. Liu, Boosting hydrogen storage performance of MgH<sub>2</sub> by efficient V<sub>2</sub>O<sub>3</sub>/C catalyst, *Journal of Alloys and Compounds* 1010 (2025) 178333. <https://doi.org/10.1016/j.jallcom.2024.178333>.
- [11] J. Zhang, L. Bian, N. Zhang, B. Wang, S. Cao, X. Wang, Y. Zhao, L. Shao, R. Yang, Y. Wang, H. Du, J. Yan, Y. Zhang, X. Lin, J. Zou, Enhancing hydrogen sorption performances of MgH<sub>2</sub> by in-situ introduction of molybdate derived FeMo nano catalysts, *Journal of Energy Storage* 130 (2025) 117418. <https://doi.org/10.1016/j.est.2025.117418>.
- [12] Q. Hou, J. Wang, Y. Zhou, P. Jiang, Y. Li, Z. Ding, Q. Wang, Y. Xiong, Sustainable synthesis of Co/C nanocomposites from biomass for advanced MgH<sub>2</sub>-Based hydrogen storage: Insights into phase transformation and catalytic mechanisms, *Journal of Power Sources* 640 (2025) 236713. <https://doi.org/10.1016/j.jpowsour.2025.236713>.
- [13] L. Qin, G. Zhang, T. Liang, L. Sun, F. Xu, Y. Xia, S.P. Verevkin, S.V. Vostrikov, A.L. Maximov, X. Xiao, L. Chen, H. Pan, Oxygen vacancy-rich Ti<sub>2</sub>N<sub>2</sub>Ti<sub>x</sub> MXene as a high-efficiency catalyst for

- enhanced hydrogen desorption of  $\text{MgH}_2$ , *Journal of Alloys and Compounds* 1030 (2025) 180702. <https://doi.org/10.1016/j.jallcom.2025.180702>.
- [14] L. Wang, B. Zhao, J. Liu, J. Yuan, Y. Zhu, B. Liu, Y. Wu, L. Li, Y. Cheng, S.X. Zhou, Effect of Ti-EG-Ni Dual-Metal Organic Crystal-Derived  $\text{TiO}_2$  /C/Ni on the Hydrogen Storage Performance of  $\text{MgH}_2$ , *ACS Appl. Mater. Interfaces* 17 (2025) 15274–15286. <https://doi.org/10.1021/acsami.4c18239>.
- [15] G. Gao, J. Xie, L. Zhang, C. Lv, C. Li, M. Fan, Z. Yao, Improvement on hydrogen storage performance of  $\text{MgH}_2$  by THF-promoted nano-crystallization under low-speed ball milling, *Rare Metals* 44 (2025) 6366–6374. <https://doi.org/10.1007/s12598-025-03330-x>.
- [16] Y. Chen, X. Li, B. Sun, G. Zhang, S. Ni, C. Li, Effect of NiFe-LDH/ $\text{FeO}(\text{OH})$  derivatives on the hydrogen storage properties of  $\text{MgH}_2$ , *International Journal of Hydrogen Energy* 121 (2025) 326–336. <https://doi.org/10.1016/j.ijhydene.2025.03.367>.
- [17] Y. Zheng, L. Zhang, H. Zheng, J. Chen, Z. Chen, Y. Liu, J. Tu, C. Gu, Catalytic effects of multiple heterointerfaces on the hydrogen storage properties of magnesium hydride, *Journal of Colloid and Interface Science* 685 (2025) 65–72. <https://doi.org/10.1016/j.jcis.2025.01.100>.
- [18] Q. Zhang, Y. Li, F. Sun, X. Lin, Z. Hu, H. Yang, J. Zou, Boosting hydrogen storage performances of  $\text{MgH}_2$  by using a Ni-MOF derived Ni/NiO@C composite containing Ni/NiO nanoheterojunctions, *Chemical Engineering Journal* 525 (2025) 169631. <https://doi.org/10.1016/j.cej.2025.169631>.
- [19] Y. Huang, J. Chang, Y. Zhang, X. Zhang, Y. Wang, H. Wu, C. Xu, C. Huang, Z. He, In-situ exploitation of sulfur from petroleum coke in Ni@SC synthesis to Boost the De-/Hydrogenation performance of  $\text{MgH}_2$ : Experimental and DFT study, *Fuel* 389 (2025) 134568. <https://doi.org/10.1016/j.fuel.2025.134568>.
- [20] R. Zhang, H. Zhang, W. Sun, Z. Yang, X. Lin, W. Guo, Y. Liu, Z. Liang, B. Li, L. Sun, T. Yu, F. Xu, Effect of CNT-referenced  $\text{FeVO}_4$  as a catalyst on the hydrogen absorption and desorption characteristics of  $\text{MgH}_2$ , *Journal of Alloys and Compounds* 1029 (2025) 180767. <https://doi.org/10.1016/j.jallcom.2025.180767>.
- [21] T. Tian, F. Liu, X. Zhang, J. Wang, S. Li, W. Chen, Y. Song, J. Li, G. Liu, Effect of porous nanosheet NiO on hydrogen storage performance of  $\text{MgH}_2$ , *International Journal of Hydrogen Energy* 135 (2025) 2–9. <https://doi.org/10.1016/j.ijhydene.2025.05.017>.
- [22] Y. Pan, X. Yang, X. Lu, J. Su, J. Kong, D. Huo, W. Zhang, Q. Hou, Enhancement catalysis of layered  $\text{CuMoO}_4$  on hydrogen storage performance of  $\text{MgH}_2$ , *Journal of Alloys and Compounds* 1017 (2025) 179129. <https://doi.org/10.1016/j.jallcom.2025.179129>.
- [23] L. Wang, B. Zhao, J. Liu, J. Yuan, Y. Zhu, B. Liu, Y. Wu, L. Li, Y. Cheng, S.X. Zhou, Effect of Ti-EG-Ni Dual-Metal Organic Crystal-Derived  $\text{TiO}_2$  /C/Ni on the Hydrogen Storage Performance of  $\text{MgH}_2$ , *ACS Appl. Mater. Interfaces* 17 (2025) 15274–15286. <https://doi.org/10.1021/acsami.4c18239>.
- [24] S. Zhao, T. Wu, K. Wang, Q. Wang, X. Mei, J. Huang, H. Liu, C. Huang, J. Guo, Synergistic dual-modification regulation of dehydrogenation kinetics of  $\text{MgH}_2$  by MOF-derived Core-shell Ni&C, *International Journal of Hydrogen Energy* 127 (2025) 241–251. <https://doi.org/10.1016/j.ijhydene.2025.04.125>.
